# 1       **Validation of a small molecule inhibitor of PDE6D-RAS interaction**

## 2                               **with potent anti-leukemic effects**

3   Sara Canovas Nunes<sup>1</sup>, Serena De Vita<sup>1</sup>, Andrew Anighoro<sup>5</sup>, François Autelitano<sup>5</sup>, Edward  
4   Beaumont<sup>5</sup>, Pamela Klingbeil<sup>5</sup>, Meaghan McGuinness<sup>1</sup>, Beatrice Duvert<sup>1</sup>, Chad Harris<sup>1</sup>, Lu  
5   Yang<sup>6</sup>, Sheela Pangen Pokharel<sup>6</sup>, Chun-Wei Chen<sup>6</sup>, Monika Ermann<sup>5</sup>, David A. Williams<sup>1,2,3,4,\*</sup>  
6   Haiming Xu<sup>1,2</sup>

7  
8   <sup>1</sup>Division of Hematology/Oncology, Boston Children's Hospital, Harvard Medical School, Boston,  
9   MA, USA.

10   <sup>2</sup>Department of Pediatric Oncology, Dana-Farber Cancer Institute, Boston, MA, USA.

11   <sup>3</sup>Harvard Stem Cell Institute, Harvard University, Boston, MA, USA;

12   <sup>4</sup>Harvard Initiative for RNA Medicine, Harvard Medical School, Boston, MA, USA;

13   <sup>5</sup>Evotec SE, Manfred Eigen Campus, Essener Bogen 7, Hamburg, Germany;

14   <sup>6</sup>Department of Systems Biology, Beckman Research Institute of City of Hope, Monrovia, CA,  
15   USA

16

17

18   \*Correspondence: [dawilliams@childrens.harvard.edu](mailto:dawilliams@childrens.harvard.edu) (D.A.W.)

19   Phone: 617-919-2697

20   FAX: 617-730-0868

21   Address: 300 Longwood Ave. Karp 08125.3, 02115 Boston, MA

22

23

### 24   **Conflict of interest:**

25   Dr Williams has been funded by the NIH. He is or was recently a member on a Board of  
26   Directors or advisory committees for: Bluebird bio, Orchard Therapeutics, Novartis, Beam  
27   Therapeutics, Emerging Therapy Solutions, Geneception, and BioMarin. Additionally, he is the  
28   Co-founder of Alerion Biosciences and Orchard Therapeutics. Dr. Anighoro, Dr. Autelitano, Dr.  
29   Beaumont, Dr. Klingbeil and Dr. Ermann declare present or past employment by Evotec while  
30   engaged in the research project. Dr. De Vita declares present employment by Novartis Institute  
31   for Biomedical Research. The remaining authors declare no conflict of interest.

32 **Abstract**

33

34 RAS mutations prevalent in high-risk leukemia have been linked to relapse and  
35 chemotherapy resistance. Efforts to directly target RAS proteins have been largely  
36 unsuccessful. However, since RAS-mediated transformation is dependent on signaling through  
37 the RAS-related C3 botulinum toxin substrate (RAC) small GTPase, we hypothesized that  
38 targeting RAC may be an effective therapeutic approach in RAS mutated tumors. Here we  
39 describe multiple small molecules capable of inhibiting RAC activation in acute lymphoblastic  
40 leukemia cell lines. One of these, DW0254, also demonstrates promising anti-leukemic activity  
41 in RAS-mutated cells. Using chemical proteomics and biophysical methods, we identified the  
42 hydrophobic pocket of phosphodiester 6 subunit delta (PDE6D), a known RAS chaperone, as a  
43 target for this compound. Inhibition of RAS localization to the plasma membrane upon DW0254  
44 treatment is associated with RAC inhibition through a phosphatidylinositol-3-kinase/AKT-  
45 dependent mechanism. Our findings provide new insights on the importance of PDE6D-  
46 mediated transport for RAS-dependent RAC activation and leukemic cell survival.

## 47 **Introduction**

48           Guanosine triphosphatases (GTPases) are small G proteins that play key roles in  
49 hematopoietic cells in a variety of cellular processes including proliferation, apoptosis, cell  
50 migration, and cytoskeleton rearrangements [1] [2]. Activating mutations in RAS  
51 GTPase isoforms have been linked to numerous types of human cancers, including myeloid and  
52 lymphoid malignancies [3] [4] [5] [6]. NRAS/KRAS mutations have been found in 20%-25% of  
53 patients with acute myeloid leukemia (AML) [5], 25%-30% of patients with juvenile  
54 myelomonocytic leukemia (JMML) [7], and 15% of pediatric patients with B- or T-lineage acute  
55 lymphoblastic leukemia (ALL) [8] [9]. Specifically, RAS mutations are highly prevalent in  
56 relapsed high-risk ALL after combination chemotherapy, and the activation of RAS signaling has  
57 been shown to act as the driver of both *de novo* and relapsed, chemotherapy resistant disease  
58 [10] [11]. The various attempts to develop drugs that directly target mutant RAS proteins have  
59 been largely unsuccessful and to this day, only specific KRAS G12C inhibitors have been  
60 developed with evidence of clinical activity in solid tumors [12] [13]. However, this specific  
61 mutation is usually not found in relapsed acute leukemia patients [11].

62           Since, in some model systems, RAS-related C3 botulinum toxin substrate (RAC)  
63 GTPase is required for full RAS transformation [14] and leukemia cell survival [15] [16], we and  
64 others have focused on inhibiting its activity to indirectly target RAS signaling [17]. Here we  
65 report the identification of a compound DW0069 and development of two derivatives, DW0254  
66 and DW0441, which demonstrated dose-dependent RAC inhibition, arrest of proliferation and  
67 induced apoptosis in human leukemic cell lines. We found that these compounds bind the  
68 hydrophobic pocket of phosphodiester 6 subunit delta (PDE6D), a RAS chaperone protein.  
69 Directed mutation of this pocket led to compound resistance, directly implicating molecule  
70 binding to PDE6D to cell growth inhibition. We further showed that treatment with DW0254  
71 disrupts the interaction between PDE6D and RAS, disturbing RAS subcellular localization.  
72 Moreover, the dose-dependent decrease in RAC activation downstream of phosphatidylinositol

73 3-kinase/protein kinase B (PI3K/AKT) provides a biochemical link between RAS and RAC in  
74 leukemia cells. In summary, our study provides evidence that PDE6D-dependent RAS  
75 trafficking with downstream activation of PI3K/AKT and RAC constitutes a novel potential  
76 therapeutic target in high risk leukemias.

## 77 **Results:**

### 78 **Identification of small molecules demonstrating RAC inhibition**

79 We hypothesized that targeting RAC could be an effective therapeutic approach for  
80 RAS-mutated leukemias.

81 Our initial screen for a RAC inhibitor depicted in Figure 1 lead to the identification of  
82 compound DW0069, and further medicinal chemistry efforts yielded the closely related  
83 compounds DW0254 and DW0441 (1, 2 and 3 respectively in Figure 2A) [18]. These early leads  
84 had suboptimal to satisfactory physiochemical properties although all showed improved  
85 biological activity on leukemia cells when compared to the tool RAC inhibitor NSC23766 [19]  
86 which showed cellular activities in the ~40-80 $\mu$ M range ([20] and Figure 2A). In contrast,  
87 DW0346 analogue with an aliphatic amide substitution (4 in Figure 2A) showed a significant  
88 reduction in inhibitory activity on leukemic cells and was used as a negative control in  
89 subsequent target validation experiments. DW0254 was further profiled as it offered the best  
90 compromise between lipophilicity, solubility, and potent biological activity. DW0254 antileukemic  
91 activity was tested on a large panel of ALL and AML cell lines that exhibited varying levels of  
92 sensitivity to DW0254 (Figure 2B). 75% were considered responsive with a mean IC<sub>50</sub> between  
93 1 and 10 $\mu$ M. Treatment of P12-ICHIKAWA cells, with the lowest IC<sub>50</sub>, caused a dose-dependent  
94 inhibition of RAC activation (Figure 2C), decrease in cell proliferation (Figure 2D) and increase  
95 in apoptosis (Figure 2E). DW0069 and DW0441 also affected cell growth, apoptosis and RAC  
96 activation (Supplemental Figure 1A-E). Unexpectedly, and in contrast with NSC23766, neither

97 DW0069 or optimized DW0254 showed inhibition of the RAC1-TIAM1 protein-protein interaction  
98 as measured by homogeneous time-resolved fluorescence (HTRF) (Figure 2F and  
99 Supplemental Figure 1F).

## 100 **Identification of PDE6D as target of DW0254**

101 In contrast with the off-target effects exhibited by NSC23766, DW0069 chemical series  
102 showed no significant inhibition against a focused panel of kinases and G protein-coupled  
103 receptors (GPCRs) (Supplemental Figure 1G) [21]. With certain key pathway targets ruled out,  
104 we embarked upon on the deconvolution of the putative molecular targets of DW0254 using  
105 cellular photoaffinity labeling methods combined with label-free quantitative mass spectrometry  
106 analysis (PAL-MS). A PAL photoprobe consisting of the DW0254 warhead covalently linked to a  
107 minimalist terminal propargyl-diazirine photocrosslinker [22] was synthesized (Figure 3A). Like  
108 its parent compound, the PAL probe possessed antiproliferation properties (data not shown),  
109 demonstrating that the photoprobe was cell permeable and retained its activity.

110 Retinal rhodopsin-sensitive cGMP 3',5'-cyclic phosphodiester 6 subunit delta (PDE6D)  
111 was identified as a target hit in P12-ICHIKAWA cells with the highest signal intensity (Log2  
112 Intensity) of 24.66 and with the highest sequence coverage of 28.6% (Figure 3B). We further  
113 confirmed PDE6D-PAL specific binding in an additional cell line, CCRF-CEM. Labeled protein  
114 patterns showed a protein band of ~17kDa photolabeled with PAL probe that was protected by  
115 excess DW0254 (Figure 3C), further identified as PDE6D with a high signal intensity of 21.44  
116 (Figure 3D). Photolabeling of recombinant human PDE6D expressed in *E. coli* also confirmed  
117 photoincorporation of the PAL probe into PDE6D that was fully protected by an excess of  
118 DW0254 (Figure 3E).

119 To gain insights into the binding site through identification of the specific photolabeled  
120 residues, recombinant PDE6D was UV-irradiated alone or with PAL probe in the presence or  
121 absence of DW0254 and analyzed by liquid chromatography–mass spectrometry (LC-MS/MS).

122 A unique tryptic peptide of human PDE6D, TKGILWQGTED, was detected with an increase in  
123 peptide mass of +581.2997m/z corresponding to the incorporation of the PAL probe, with a >4-  
124 fold lower peak intensity in the presence of the competitor DW0254 (Figure 3F). PAL probe-  
125 modified peptide and its unlabeled control MS data were manually evaluated for the presence of  
126 specific probe-labeled b- or y-type fragment ions to further refine the localization of the  
127 photoadduct to a specific amino acid. Fragment ions y1-y6 and b1-b9 were detected in the  
128 unlabeled control TKGILWQGTED peptide (Figure 3G, top). The PAL-modified peptide (Figure  
129 3G, bottom) shared the same fragment ions except for y1 and y2 suggesting that the PAL probe  
130 photolabeled, in a DW0254-inhibitable manner, residues E36 or D37 within the hydrophobic  
131 pocket of the molecule.

### 132 **Saturating mutagenesis screen hints at DW0254 binding mode**

133 To further validate PDE6D as the biological target, to identify additional key residues for  
134 binding, and to link target engagement to the observed phenotype, we designed a sgRNA  
135 library (Supplemental Table 1) and performed a saturation mutagenesis screen of PDE6D.  
136 spCas9-expressing P12-ICHIKAWA cells were transduced with the PDE6D sgRNA library and  
137 treated with DW0254 with the goal of selecting resistant cells. After 2 weeks of treatment, 35%  
138 of library-transduced cells were alive, compared to 3% of the empty vector control cells (Figure  
139 4A). A robust editing efficiency was confirmed by the decrease in positive control sgRNAs that  
140 targeted essential genes (Figure 4B). Specific sgRNAs were significantly enriched after  
141 DW0254 treatment, including sgRNA#144, which was identified at 20-fold increased frequency  
142 relative to DMSO-treated cells (Figure 4C, blue dot) and cells exhibited a ~3-fold higher IC<sub>50</sub>  
143 when compared to untreated library transduced cells (Figure 4D), confirming decreased  
144 compound sensitivity. Deltrasin, a commercially available PDE6D inhibitor, and additional  
145 derivative compounds have previously been reported to bind in PDE6D's hydrophobic pocket  
146 and inhibit the growth of pancreatic cancer cell lines [23]. Since our data suggests the same

147 binding site for DW0254, we tested DW0254-treated PDE6D-edited cells for sensitivity to  
148 Deltarasin. While unedited cells displayed a higher IC<sub>50</sub> to Deltarasin (grey in Figure 4E) when  
149 compared to DW0254 (grey in Figure 4D), DW0254-treated PDE6D-edited cells demonstrated  
150 no increased resistance to Deltarasin (Figure 4E).

151 Next, to define the mutations generated with sgRNA#144 and confirm their association  
152 with resistance to DW0254, we transduced spCas9 expressing cells with sgRNA#144 alone.  
153 Resulting edited cells demonstrated a resistance phenotype as early as 10 days after treatment,  
154 with a 5-fold increase in cell counts when compared to controls, and robust cell growth after day  
155 14 (Figure 4F). Importantly, 100% of empty vector control cells were dead after 17 days of  
156 treatment with DW0254 and no resistance was observed in this condition (Figure 4F).  
157 Continued selection led to >30-fold increased IC<sub>50</sub> (Figure 4G). Although highly resistant to  
158 DW0254, these edited cells showed no increased resistance to Deltarasin (Figure 4H).  
159 Resistant cells genome was enriched for INDELS that would cause the deletion of V49 and  
160 neighboring residues within the hydrophobic pocket of PDE6D (data not shown). We validated  
161 these predicted mutations using long-range RT-PCR and documented a -6bp in-frame mutation  
162 that would cause the combined deletion of R48 and V49 residues (Supplemental Figure 2B) and  
163 two out-of-frame mutations (+1bp and -8bp) that both lead to a frame-shift with the formation of  
164 a new open reading frame (ORF) with 124 and 127 instead of 150 residues, respectively  
165 (Supplemental Figure 2C). Since the new ORF is predicted to translate into a protein that is  
166 missing a substantial portion of the hydrophobic pocket and such a change would most likely  
167 prevent correct protein folding, we focused our subsequent studies on R48del V49del PDE6D.

168 To definitively confirm the causal relationship of this mutation to the observed resistance  
169 to DW0254, we next isolated sgRNA#144 transduced single cell clones before treatment with  
170 DW0254. Edited single cell clones (SC7 and SC17) which harbored R48 and V49 deletions  
171 showed a 6-8-fold increased IC<sub>50</sub> to DW0254 when compared to controls (Figure 4I) while again  
172 showing no resistance to Deltarasin (Figure 4J).

## 173 **Distinct binding of DW0254 to PDE6D hydrophobic pocket**

174           Next, we determined the binding affinities of the various compounds by isothermal  
175 calorimetry (ITC) using recombinant PDE6D protein. For the DW compounds, ITC binding  
176 affinity is in line with the order of cellular activities while Deltarasin showed a slightly higher  
177 affinity to the protein when compared to DW0254 (Figure 5A). Inactive DW0346 showed very  
178 weak affinity with  $K_d$  68.5 $\mu$ M by ITC. Cocrystal structure of DW0254 with recombinant PDE6D  
179 shows the small molecule bound inside the hydrophobic pocket, with hydrogen bond  
180 interactions via glutamine Q88, tyrosine Y149 and arginine R61, the latter interaction being  
181 water mediated (Figure 5B). Deltarasin can occupy the same pocket undergoing hydrogen  
182 bonding with the same residues R61 and Y149, but also with cysteine C56 (Figure 5C), which  
183 differentiates it from the interactions observed for DW0254. The observed network of hydrogen  
184 bonding with the protein backbone supports the strong enthalpy ( $\Delta H$ ) driven binding for both  
185 molecules as observed by ITC (Figure 5A).

186           Guided by the crystallographic information we were also able to postulate a binding pose  
187 for the PAL probe (Supplemental Figure 3). To contextualise the crystallographic binding modes  
188 with the saturating mutagenesis screen results, superimposing the binding poses of DW0254  
189 and Deltarasin highlighted that V49 defines the shape of the pocket (light grey area, Figure 5D),  
190 and establishes hydrophobic contacts only with DW0254 (cyan) but not Deltarasin (orange).  
191 Additionally, *in silico* docking of DW0254 to R48del V49del PDE6D confirmed an accentuated  
192 increase in the root mean square deviation (RMSD) in contrast with Deltarasin's RMSD that was  
193 only marginally affected (Figure 5E), strongly suggesting DW0254 would be unlikely to bind  
194 PDE6D in the event of deletion of these two residues. Interestingly, the combination of DW0254  
195 and Deltarasin had a synergistic effect *in vitro* (Figure 5F) with the lowest combination index at a  
196 1:2 range (Figure 5G), suggesting that even though binding of these compounds to PDE6D is  
197 mutually exclusive, they may target different protein conformations more efficiently. However,



198 while DW0254 exhibited low toxicity to CD34<sup>+</sup> healthy donor cells at therapeutic dosages,  
199 Deltarasin showed decreased colony counts even at low dosages (Figure 5H) indicating  
200 possible off-target effects of the latter.

## 201 **RAS protein dynamics and downstream effects of DW0254**

202 PDE6D has been shown to bind farnesylated RAS proteins and facilitate their trafficking  
203 and plasma membrane (PM) localization [24, 25]. To determine the effect of DW0254 on  
204 PDE6D-RAS interactions, we generated P12-ICHIKAWA cells that stably expressed a FLAG-  
205 tagged human PDE6D protein. Co-immunoprecipitation studies confirmed PDE6D binding to  
206 both RAS and ADP-ribosylation factor-like protein 2 (ARL2) protein essential for cargo  
207 displacement, that decreased after treatment with DW0254 (figure 6A). No direct binding was  
208 observed between PDE6D and RAC (Figure 6A).

209 PDE6D has been reported to chaperone NRAS, HRAS, and KRAS4B but not KRAS4A  
210 [25, 26]. While all RAS isoforms were detected in a panel of DW0254-sensitive ALL cell lines,  
211 the most abundantly activated isoforms were NRAS in P12-ICHIKAWA and KRAS4B in RS4;11  
212 and CCRF-CEM (Figure 6B and 6C). To further test whether the DW0254-dependent disruption  
213 of the interaction between PDE6D and RAS is associated with altered subcellular localization of  
214 RAS, we used fluorescently-tagged mutant RAS proteins to analyze RAS localization before  
215 and after treatment with DW0254 in adherent PANC-1 cells. Live-cell fluorescence imaging  
216 demonstrated that mutant KRAS4B and NRAS dissociated from the PM and accumulated into  
217 the cytosol after DW0254 treatment (Figure 6D).

218 Biological effects of RAS proteins are exerted from the PM through the activation of  
219 kinase pathways including PI3K/AKT and MAPK/ERK, which are commonly constitutively  
220 activated in cancer [27]. We observed decreased activation of PI3K/AKT and MAPK/ERK  
221 pathways, measured by levels of phospho-AKT and phospho-ERK, upon inhibition of PDE6D-  
222 RAS interaction by DW0254 (Figure 6E, left panel). Next, to establish a biochemical link

223 between RAC and RAS pathway inhibition we examined if RAC activation is affected by the  
224 inhibition of PI3K/AKT or MEK/ERK pathways. The PI3K inhibitor LY294002 clearly decreased  
225 GTP-RAC levels while the MEK inhibitor U0126 had no demonstrable effect on RAC activity  
226 (Figure 6E). Taken together these results provide a potential molecular link between PDE6D  
227 pocket occupation by DW0254, RAS mislocalization, decreased downstream pathway  
228 activation, and inhibition of RAC activity.

### 229 **DW0254 anti-leukemic activity in a murine xenograft model**

230 Initial *in vivo* pharmacokinetics (PKs) assays demonstrated low solubility and rapid  
231 plasma clearance of DW0254 (data not shown) which meant direct *in vivo* treatments could not  
232 be performed. We examined the antitumor effects of PDE6D inhibition on leukemia cell growth  
233 *in vivo* by treating luciferase-expressing P12-ICHIKAWA cells with DW0254 before  
234 transplantation into sub-lethally irradiated non-obese diabetic severe combined  
235 immunodeficiency-gamma (NSG) mice (as depicted in Figure 6A). After this short exposure to  
236 DW0254 we observed a minimal increase in cells in the G1 phase of the cell cycle ( $64.1\% \pm$   
237  $0.2\%$  for DW0254 vs  $61.2\% \pm 0.7\%$  for DMSO control,  $p < 0.01$ ) and in early apoptosis ( $15.6\% \pm$   
238  $5.7\%$  for DW0254 vs  $10.4\% \pm 3.6\%$  for DMSO control,  $p < 0.01$ ), with negligible effects on late  
239 apoptosis and cell death before transplantation (Figure 6B-C). However, disease burden as  
240 assessed using bioluminescence imaging was significantly reduced in mice injected with  
241 DW0254 treated cells compared to the vehicle control group on days 13, 16, 21 and 24 after  
242 injection (Figures 6D-F). In line with the fact that PDE6D inhibition by DW0254 is reversible, *ex*  
243 *in vivo* treatment did not result in a survival advantage (data not shown). In summary, the  
244 decrease in tumor burden observed up to 24 days after transplant suggests that PDE6D  
245 inhibition causes a reduction in the tumorigenic potential of leukemia cells.

### 246 **Discussion:**

247           The results presented in this manuscript provide evidence of the importance of PDE6D  
248 in sustaining RAS activity and consequently, the survival off leukemic cells.

249           Treatment of ALL cell lines with DW0254 resulted in a clear decrease in GTP RAC.  
250 However, binding between DW0254 and RAC was not observed contradicting computer-aided  
251 drug design methodologies. We determined the direct target of DW0254 to be PDE6D, a  
252 chaperone protein that facilitates cytoplasmic trafficking of farnesylated molecules, including  
253 RAS, as a target for this compound, thus linking RAS transport with Rac GTPase activation in  
254 leukemic cells. Saturating mutagenesis experiments showed that the deletion of R48 and V49  
255 residues causes changes to PDE6D pocket that prevent binding to DW0254 and result in  
256 resistance to the compound. The binding mode for DW0254 in PDE6D farnesyl binding pocket  
257 was also confirmed by crystallography and is different than the binding mode of another  
258 previously described inhibitor, Deltarasin. Further emphasizing the importance of this difference,  
259 R48del V49del edited cells are not resistant to Deltarasin. Interestingly, the combination of  
260 DW0254 and Deltarasin had a significant synergistic effect suggesting that these compounds  
261 might be targeting singular conformations of PDE6D with different efficiencies. Indeed, large  
262 conformational changes in PDE6D to facilitate the binding of farnesylated RAS proteins deeper  
263 within the hydrophobic pocket have been previously described [28]. Additionally, DW0254 did  
264 not show any toxicity to CD34<sup>+</sup> healthy donor cells at therapeutic levels, suggesting a potential  
265 for translational improvement of this inhibitor. Even though a role for PDE6D on blood cell  
266 differentiation has not been previously described, low dosages of Deltarasin led to decreased  
267 colony counts.

268           DW0254 treatment leads to the delocalization of RAS from the plasma membrane,  
269 where it can activate downstream factors [29], to the cytoplasm, as had been previously  
270 reported with other PDE6D inhibitors [23]. As shown here and in line with recent studies on the  
271 importance of RAS membrane localization [29], RAS delocalization ultimately results in an  
272 inability to activate target pathways including MAPK/ERK, PI3K/AKT, and consequently RAC.

273 Active KRAS4B, which is solely dependent on PDE6D trafficking for its transport to the  
274 membrane, was found in WT RAS cell line RS4;11 which is highly responsive to DW0254. As  
275 discussed, delocalization of KRAS4B downstream of PDE6D pocket occupation by DW0254  
276 leads to PI3K/AKT inhibition which has previously been implicated in RS4;11 cell death [30].  
277 Together with the fact that IC<sub>50</sub> values did not correlate with RAS mutational status of acute  
278 leukemia cell lines, this suggests that RAS pathway activation might be a better predictor of  
279 response to PDE6D inhibition. However, one additional target of DW0254 was identified in one  
280 ALL cell line by PALMS assay with a lower signal intensity (Log<sub>2</sub> Intensity 20.50 compared with  
281 24.66 for PDE6D) and sequence coverage (8.1% compared to 28.6% for PDE6D) (data not  
282 shown). This target is being validated and could also contribute to the effects observed on  
283 leukemic cell division and viability.

284 In conclusion, we have validated the RAS chaperone PDE6D as a novel molecular  
285 target for aggressive leukemias. We have derived a series of compounds with demonstrated  
286 PDE6D inhibition that bind to its hydrophobic pocket differently from a previously identified  
287 inhibitor series showing little toxicity to normal human and mouse hematopoietic progenitor  
288 cells. The binding of DW0254 to PDE6D resulted in delocalization of RAS from the membrane  
289 and consequent inhibition of major pro-survival pathways including MAPK/ERK, PI3K/AKT and  
290 downstream RAC activation. These results also suggest that combinatorial strategies that inhibit  
291 parallel signaling through these pathways may increase the anti-leukemic responses and  
292 become particularly clinically significant in treating relapsed patients.

## 293 **Methods:**

## 294 **Cell lines**

295 CCRF-CEM, RS4;11, MV4;11, and PANC-1 cells were obtained from ATCC and all  
296 others from DSMZ. Cells were cultured according to suppliers' instructions and periodically  
297 tested for the presence of mycoplasma.

### 298 **Cell Viability Assay**

299 Cells were treated for 3 days at  $1 \times 10^5$  cells/ml with limiting dilutions of DW0254 or  
300 DMSO only. On day 3, cells were stained with DAPI at a  $1 \mu\text{g/ml}$  final concentration and the  
301 number of viable (DAPI-) cells in  $25 \mu\text{l}$  of media were counted using BD LSR II.

### 302 **AnnV/PI Staining and Cell Cycle Analysis**

303 P12-ICHIKAWA cells were plated at a  $2 \times 10^5$  cells/ml concentration with DW0254 or  
304 DMSO for 3 days. Cells were labelled with Dead Cell Apoptosis Kit with Annexin V FITC and PI  
305 (Thermo Fisher) or fixed in 70% ethanol at  $4^\circ\text{C}$  overnight, followed by incubation with  $10 \mu\text{g/ml}$   
306 Ribonuclease A (Sigma-Aldrich, St Louis, MO) and  $50 \mu\text{g/ml}$  PI (BD Biosciences PharMingen,  
307 San Diego, USA) or  $10 \mu\text{g/ml}$  DAPI (Thermo Fisher). Flow cytometry analysis was performed on  
308 a BD LSR II.

### 309 **Generational Cell Tracing**

310 Cells were stained with CellTrace™ Far Red (Thermo Fisher) following manufacturer's  
311 instructions and incubated with DW0254 or DMSO. Cells were analyzed on BD LSR II after 15  
312 minutes (Time 0) and the following 3 days at the same time.

### 313 **Recombinant Protein Expression and Purification**

314 Recombinant human Rac1 (Q2-L177) with TEV-protease cleavable 6xHis-tag fused to  
315 its N-terminus, and truncated recombinant human Tiam1 (R1033-E1406) with FLAG-tag fused  
316 to its N-terminus were cloned into in the pTrilJ-HV vector and expressed in BL21 (DE3). Rac1

317 protein went through a nickel affinity column followed by a Resource Q column and finally  
318 Superdex 75 (GE Healthcare) before concentration to 25mg/ml. Tiam1 protein was purified  
319 using the ANTI-FLAG® M2 affinity gel (Sigma-Aldrich) followed by Superdex 75. Recombinant  
320 human PDE6D (S2-V150) with TEV-protease cleavable 6xHis-tag fused to its N-terminus, was  
321 cloned into pET28a, expressed in BL21-CodonPlus (DE3)-RIL and purified using nickel affinity  
322 chromatography followed by TEV protease cleavage, tag removal, and finally Superdex 75  
323 before concentration to 13mg/ml.

### 324 **Isothermal calorimetry (ITC)**

325 PDE6D was dialyzed in buffer (20mM HEPES pH7.3, 150mM NaCl, 1mM TCEP) at 4°C,  
326 overnight. Titrations were carried out on an iTC200 calorimeter (MicroCal Inc). PDE6D (200µM  
327 with 2% DMSO) was titrated into small molecule in the cell (20µM in degassed dialysis buffer  
328 with 2% DMSO final) and data were analyzed using Origin (OriginLab Corp.) and fitted by using  
329 a single-site binding model.

### 330 **Rac1-Tiam1 homogeneous time-resolved fluorescence assay (HTRF)**

331 30nM His-tagged Rac1 protein was pre-incubated with compound at room temperature  
332 in assay buffer (50mM Hepes (pH 7.6), 100mM NaCl, 1mM DTT, 10mM MgCl<sub>2</sub>, 0.1% Nonidet P-  
333 40). After 30 minutes pre-incubation, 300nM FLAG-tagged Tiam1, 2nM anti-His-Eu3+, 20nM  
334 anti-FLAG-XL665 were added. After 60 minutes RT incubation, 500mM Potassium Fluoride (KF)  
335 was added and the reaction was measured after 30 minutes with EnVision 2104 Multilabel  
336 Reader (Perkin Elmer) with the following settings. Ex: 320nm; Em1: 615nm; Em2: 665nm;  
337 Dichroic Mirror: D400.

### 338 **High Density sgRNA Library of Human PDE6D**

339 sgRNA sequences targeting the coding regions of human PDE6D (NM\_002601.3) were  
340 designed using Genetic Perturbation Platform from Broad Institute [31] (Supplemental table 1).  
341 Briefly, sgRNA oligonucleotides were synthesized via microarray (CustomArray) and cloned into  
342 the ipUSEPR lentiviral sgRNA vector that co-expresses a puromycin-resistant gene [puro<sup>R</sup>] and  
343 a red fluorescent protein [tagRFP]. The PDE6D scan library contains 116 unique sgRNA was  
344 packaged by HEK293 cells (ATCC) co-transfected with psPAX2 (Addgene) and pMD2.G  
345 (Addgene) to produce lentiviral particles. The lentiviral library was pre-titrated to obtain 5-10%  
346 infection (monitored by flow cytometry for tagRFP expression from ipUSEPR) in P12-ICHIKAWA  
347 spCas9 expressing cells. Each screen culture was calculated to maintain at least 1,000x of the  
348 number of constructs in the library. The infected cultures were selected by sorting of RFP<sup>+</sup> cells  
349 3 days after transduction and expanded in supplemented media with puromycin (2.5µg/ml;  
350 InvivoGen) and blasticidin (1µg/ml; InvivoGen) for 3 additional days. Finally, selected cells were  
351 pelleted (day 0) and cultured in DMSO or 2.0µM DW0245. After 14 days treatment cells were  
352 again pelleted. For sequencing sgRNAs, the genomic DNA of the screened cell pellets was  
353 harvested, PCR-amplified (NEBNext Ultra II Q5; NEB) using primers DCF01 5'-  
354 CTTGTGGAAAGGACGAAACACCG-3' and DCR03 5'-CCTAGGAACAGCGGTTTAAAAAAGC-  
355 3' and subjected to single-end 75 bp (SE75) high-throughput sequencing using a NextSeq550  
356 (Illumina).

357 To quantify sgRNA reads in the library, we first extracted 20-nucleotide sequences that  
358 matched the sgRNA backbone structure (5' prime CACCG and 3' prime GTTT) from raw fastq  
359 reads. Extracted reads were then mapped to the PDE6D sgRNA library sequences using  
360 Bowtie2 [32]. Reads that were a perfect match to the reference were counted. The frequency for  
361 individual sgRNAs was calculated by the read counts of each sgRNA divided by the total read  
362 counts matched to the library. The CRISPR score was defined by the fold change of the  
363 frequency of individual sgRNAs between early (day 0) and late (defined time points) of the  
364 screened samples.

## 365 **Crystallization and Structural Determination**

366 Native PDE6D crystals were grown by vapor diffusion at 22°C by mixing equal volumes  
367 of protein with precipitant (0.1M HEPES pH6.8-7.5, 20mM MgCl<sub>2</sub>, 20mM NiCl<sub>2</sub> and 15-20%  
368 PEG3350). DW0254 and Deltarasin were incubated with PDE6D at 4°C, at 4mM and 1mM final  
369 respectively. The PDE6D::Deltarasin complex was further concentrated to 19 mg/ml prior setting  
370 up the crystallization trays. PDE6D::Deltarasin and PDE6D::DW0254 complexes were grown by  
371 vapor diffusion at 22°C in (0.1 M Sodium acetate pH4.0-4.5 and 28–30% PEG3350) and (0.1M  
372 HEPES pH6.8-7.5, 20mM MgCl<sub>2</sub>, 20mM NiCl<sub>2</sub> and 15-20% PEG3350) respectively. Prior to  
373 freezing in liquid nitrogen, crystals were cryoprotected by brief transfer to a solution of  
374 crystallization condition reservoir supplemented with 25% glycerol. Data were collected on  
375 beamlines at Diamond Light Source (Oxford, U.K.) and ALBA (Barcelona, Spain). Data were  
376 processed using XDS, xia or DIALS. Molecular replacement was performed using PHASER  
377 (using PDB code 5NAL as a reference model), and the refinement was performed with refmac5,  
378 buster and COOT. Compound dictionaries were generated using AFITT.

## 379 **Combination Index Analysis**

380 Each drug was used alone or in combination at a concentration approximately equal to  
381 its IC<sub>50</sub> and at concentrations within 2-2.5-fold increments above or below. Each data point was  
382 performed in triplicates. In this model, combination index (CI) scores estimate the interaction  
383 between the two drugs. If CI<1, the drugs have a synergistic effect [33]. To allow a direct  
384 comparison of the dose-response curves, each drug concentration was normalized to its own  
385 IC<sub>50</sub> value and named IC<sub>50</sub> equivalent (IC<sub>50</sub>eq) as previously described by Zhao et.al. [34]:

$$386 \text{IC}_{50\text{eq}} = \frac{C_{a,x}}{\text{IC}_{50,a}} + \frac{C_{b,x}}{\text{IC}_{50,b}}.$$

## 387 **PDE6D Co-immunoprecipitation (Co-IP)**



388 NH3-terminal FLAG-tagged human PDE6D was constructed by PCR, checked by  
389 sequencing, and subcloned into the BglIII and EcoRI site of MSCV-IRES-GFP vector. GFP<sup>+</sup> P12-  
390 ICHIKAWA cells were sorted 48 hours after lentiviral infection.

391 Cells with stable expression of FLAG-tagged human PDE6D were lysed in 1X cell lysis  
392 buffer (#9803, Cell Signaling, Danvers, MA) and incubated with anti-FLAG M2 Affinity Gel  
393 (A2220, Sigma-Aldrich) overnight at 4°C. Protein complexes were washed 5 times with 1mL  
394 lysis buffer, then 2X SDS sample buffer was added, following 100°C incubation for 5min.

### 395 **RAS and RAC activity assay**

396 RAS and RAC activity were measured using a RAF-1 RBD and PAK-1 PDB pull-down  
397 assay kits respectively (Cat#17218 and Cat#14325, Millipore Sigma) following manufacturer's  
398 instructions. For comparison with total corresponding protein, 5–10% of total lysates used for  
399 pulldown were loaded to adjacent wells.

### 400 **Transfection and Fluorescent Imaging**

401 PANC-1 cells were collected from a confluent flask, split 1:5 and plated on 35mm  $\mu$ -  
402 Dishes with a polymer coverslip bottom (Ibidi) and incubated in a humidified 37°C incubator with  
403 5% CO<sub>2</sub> for 24 hours. The next day cells were transfected with pEGFP-C3 KRAS4B 12V or  
404 pEGFP-C3 NRAS 12D using Lipofectamine 3000 (Thermo Fisher) following manufacturer's  
405 instructions, and incubated for 3 days in a humidified 37°C incubator with 5% CO<sub>2</sub>. Cells in  
406 1.8ml PBS with 10%FCS were imaged in a Nikon Eclipse Ti inverted microscope with a  
407 humidified live cell imaging chamber using NIS-Elements software. 200 $\mu$ l of PBS with 10%  
408 DMSO only or of 200 $\mu$ M DW0254 previously diluted in PBS with 10% DMSO were added, and  
409 samples were imaged every 5 minutes for 1 hour.

### 410 **Bioluminescent imaging for DW0254 ex vivo efficacy studies**

411 To generate a cell line with luciferase expression, P12-ICHIKAWA cells were infected  
412 with Lenti-FUW-Luc-mCh-puro virus and selected in liquid culture with puromycin (Sigma-  
413 Aldrich) 2.5µg/mL for 7 days following mCherry<sup>+</sup> cell sorting.

414 All animal studies were approved by the Boston Children's Hospital or Dana-Farber  
415 Cancer Institute Animal Care and Use Committee. 8- to 10-week-old NOD-scid IL2Rgamma<sup>null</sup>  
416 (NSG) mice (Jackson laboratories, Bar Harbor, ME) were sublethally irradiated with 300 cGy  
417 and injected with 1x10<sup>6</sup> luciferase expressing P12-ICHIKAWA cells treated for 12 hours with  
418 DMSO or 3µM DW0254. Disease burden was assessed using bioluminescence imaging starting  
419 six days after injections. Prior to imaging, each mouse was given an intra-peritoneal (i.p.)  
420 injection of luciferin (PerkinElmer, Part Number #122799) at a dose of 150mg/kg body  
421 weight. General anesthesia was then induced with 5% isoflurane and the mouse was placed in  
422 the light-tight heated chamber; anesthesia was continued during the procedure with 2%  
423 isoflurane introduced via nose cone. Both prone and supine images were recorded.

424 Optical images were displayed and analyzed with the Igor (WaveMetrics, Lake Oswego,  
425 OR) and IVIS Living Image (Xenogen) software packages. Regions were manually drawn  
426 around the bodies of the mice to assess signal intensity emitted. Optical signal was expressed  
427 as photon flux, in units of photons/s/cm<sup>2</sup>/steradian. The total photon flux for each mouse was  
428 calculated as the sum of prone and supine photon flux.

#### 429 **PAL Probe Synthesis, Photoaffinity Labelling and LC-MS/MS**

430 All the information regarding the synthesis of PAL probe, and specifics on photoaffinity  
431 labelling and LC-MS/MS data collection and analysis are available under supplementary  
432 information.

#### 433 **Statistical analysis**

434 Data were presented as mean  $\pm$ SD. The unpaired t test was used for comparisons  
435 between groups at each time point.  $P < .05$  was considered significant.

#### 436 **Data Availability**

437 The coordinates for the apo PDE6D alone and bound to Deltarasin or DW0254 have  
438 been deposited in the PDB under accession codes 7PAC, 7PAE and 7PAD respectively.  
439 Authors will release the atomic coordinates and experimental data upon article publication.

#### 440 **Acknowledgments**

441 The authors thank the Flow Lab HSCI Core at BCH for their help in cell sorting  
442 experiments; Hiroko Hishikawa from the BCH ARCH team for help with IVIS setup; Mark Philips  
443 for the mutant Ras plasmids; Jenna Wood for animal husbandry and experimental support;  
444 Mursal Hassan and Timothy Colby for assistance in manuscript preparation and submission;  
445 Alejandro Gutierrez, Scott Armstrong, Nathanael Gray, and the members of the Williams  
446 laboratory for the helpful discussions.

447 This work is supported by grant 5R01CA202756 (D.A.W.), and a ALSF Young  
448 Investigator Award 19-16300 co-funded by Alex's Lemonade Stand Foundation and Cure4Cam  
449 (S.C.N.).

#### 450 **Author contributions:**

451 S.C.N., S.D.V., A.A., F.A., E.B., P.K., M. MG., B. D., C. H., H.X. conducted experiments  
452 and/or data analysis. S.C.N., F.A., E.B., CW. C., M.E., D.A.W. and H.X. designed experiments.  
453 S.C.N., F.A., E.B., M.E., D.A.W. and H.X. wrote the paper.

#### 454 **Conflict of interest:**

455 Dr Williams has been funded by the NIH. He is or was recently a member on a Board of  
456 Directors or advisory committees for: Bluebird bio, Orchard Therapeutics, Novartis, Beam  
457 Therapeutics, Emerging Therapy Solutions, Geneception, and BioMarin. Additionally, he is the  
458 Co-founder of Alerion Biosciences and Orchard Therapeutics. Dr. Anighoro, Dr. Autelitano, Dr.  
459 Beaumont, Dr. Klingbeil and Dr. Ermann declare present or past employment by Evotec while  
460 engaged in the research project. Dr. De Vita declares present employment by Novartis Institute  
461 for Biomedical Research. The remaining authors declare no conflict of interest.

# Figure 1

bioRxiv preprint doi: <https://doi.org/10.1101/2022.03.14.484294>; this version posted March 14, 2022. The copyright holder for this preprint (which was not certified by peer review) is the author/funder. All rights reserved. No reuse allowed without permission.

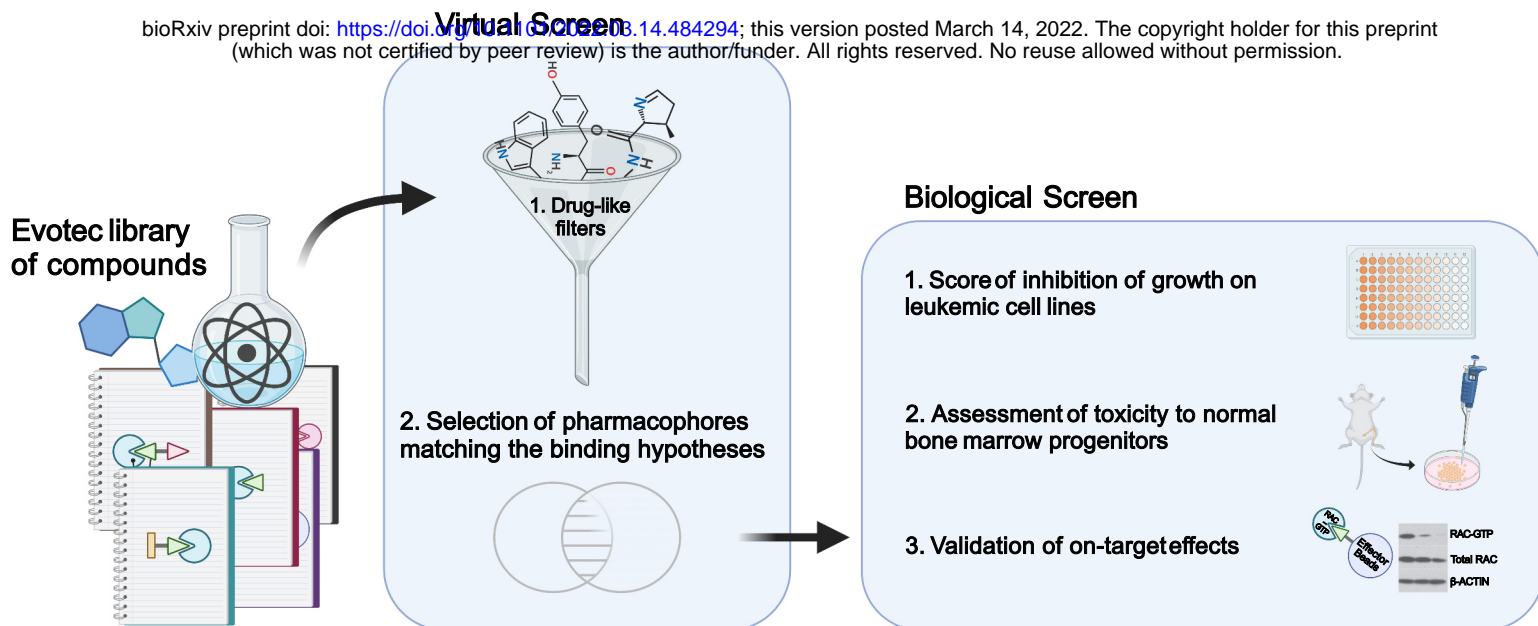

462 **Figure 1. Compound screen for Rac inhibitors.** A virtual screen of Evotec's library of  
463 commercially available compounds was performed that included an initial filtration for drug-like  
464 properties, followed by a preselection against shape-based pharmacophore of published RAC  
465 inhibitors. Next, a biological screen was carried out consisting of: i) scoring for inhibition of  
466 growth on leukemic cell lines of 107 selected compounds, ii) assessment of toxicity to normal  
467 bone marrow progenitors of compounds that showed good anti-leukemic activity, and iii)  
468 validating on-target effects by RAC PBD pull down of non-toxic compounds. Created with  
469 BioRender.com.

# Figure 2

bioRxiv preprint doi: <https://doi.org/10.1101/2022.03.14.484294>; this version posted March 14, 2022. The copyright holder for this preprint (which was not certified by peer review) is the author/funder. All rights reserved. No reuse allowed without permission.

**A**

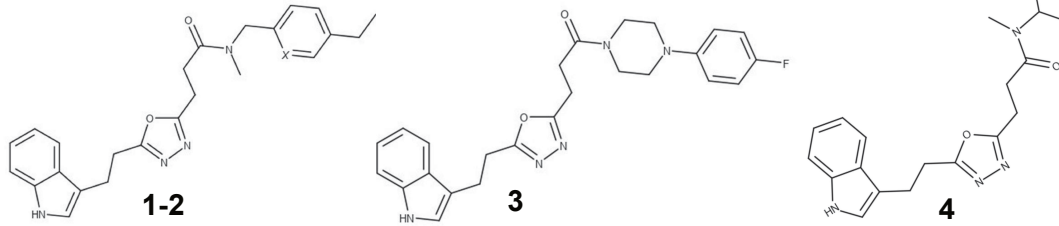

| Compound   | X = | logD <sub>7.4</sub> | Kinetic Aq Sol [mg/mL] | IC <sub>50</sub> [μM] ± CI 95% |
|------------|-----|---------------------|------------------------|--------------------------------|
| (1) DW0069 | N   | 4.1                 | 0.18                   | 15.53 - 22.93                  |
| (2) DW0254 | CH  | 2.9                 | <0.01                  | 0.89 - 1.14                    |
| (3) DW0441 | -   | 3.4                 | 0.02                   | 0.01 - 1.49                    |
| (4) DW0346 | -   | 2.3                 | 0.71                   | >50                            |
| NSC23766   | -   | -0.2                | 1                      | >50                            |

**B**

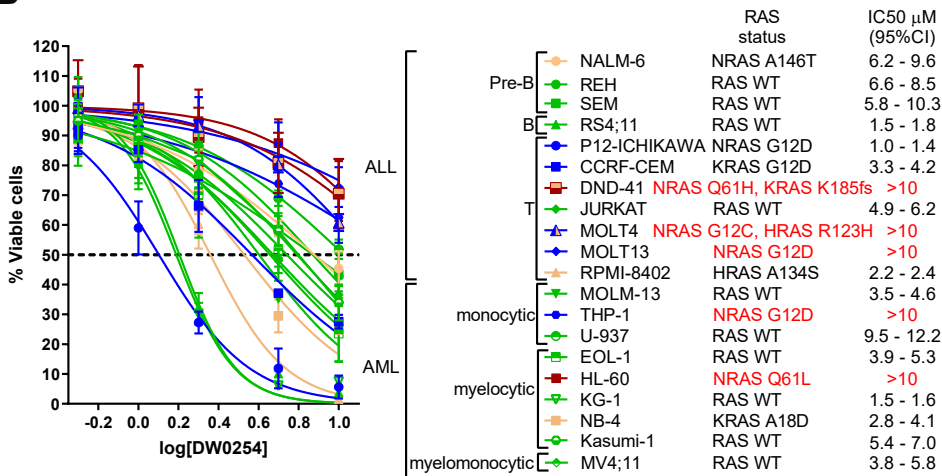

**C**

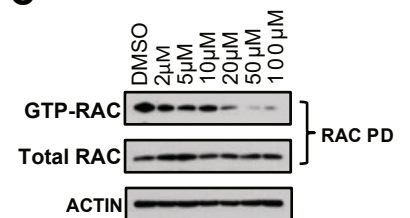

**D**

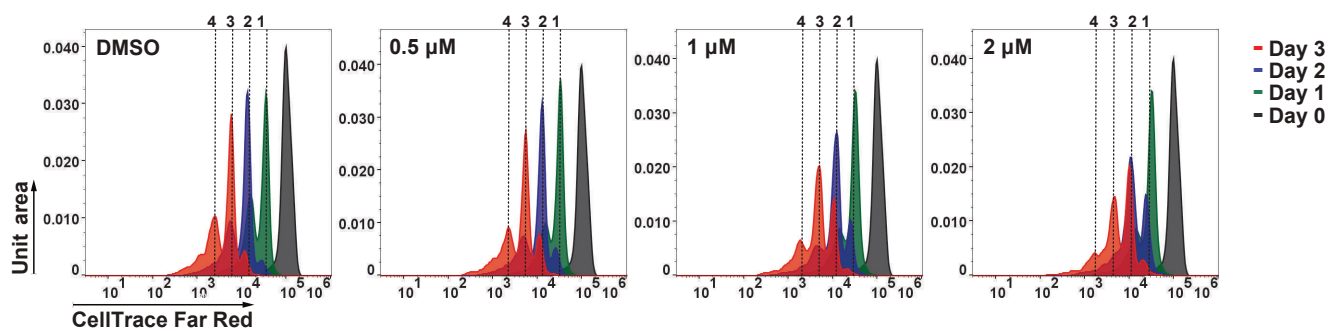

**E**

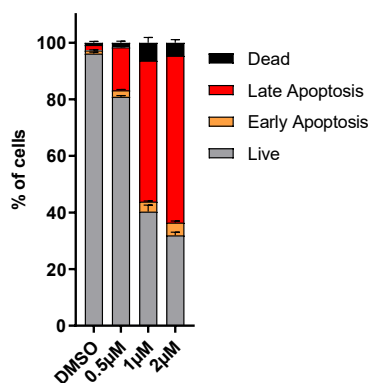

**F**

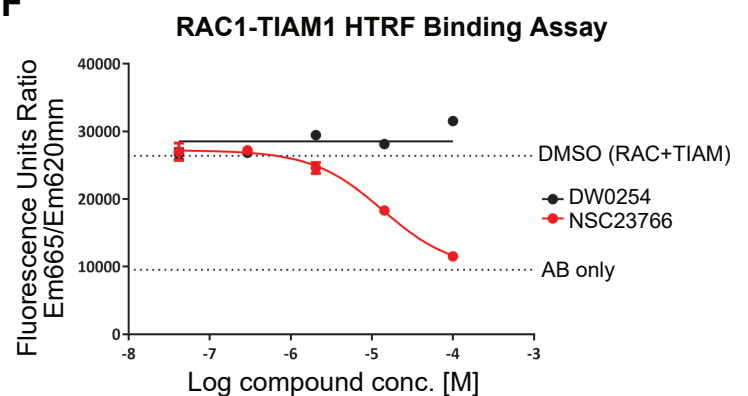

470 **Figure 2. Compound DW0254 inhibits RAC activation and shows anti-leukemic activity in**  
471 **vitro in leukemia cell lines. A)** Chemical structure, physicochemical properties, and biological  
472 activities cell line for compounds 1-4 and NSC23766 (structure not shown), a known inhibitor of  
473 RAC. IC<sub>50</sub> values represent the dose at which 50% cell viability was achieved on P12-  
474 ICHIKAWA cells. **B)** Drug dosage curve showing live cell viability assay after 3 days of DW0254  
475 treatment of human ALL and AML cell lines with diverse backgrounds and RAS status as  
476 described, n=4 at each dosage, data show mean ± SD, one of three individual experiments  
477 showing the consistent results. Color code: WT RAS green, G12 mutant RAS blue, Q61 mutant  
478 RAS burgundy, other RAS mutations yellow. **C)** GTP-RAC activity inhibition in P12-ICHIKAWA  
479 cells treated with different doses of DW0254 for 3 hours. GST pulldown assays were conducted  
480 by incubating lysates with PAK1-PBD beads. Cell lysates to detect total RAC and proteins  
481 eluted from the PAK1-PBD beads to detect GTP-RAC were subjected to Western blotting using  
482 anti-RAC (610651, BD Transduction laboratories, San Jose, CA) and anti-beta ACTIN (A5441,  
483 Sigma-Aldrich) antibodies. Data are representative of three individual experiments. **D)**  
484 Representative peaks of Far Red CellTrace staining of P12-ICHIKAWA cells treated with  
485 different doses of DW0254 and examined by FACS on three consecutive days. Peaks 1-4  
486 represent the number of times the cells in each peak have divided; data shown from one of the  
487 three independent experiments. **E)** Bar graph showing percentage of apoptosis by AnnV/PI  
488 staining of P12-ICHIKAWA cells treated for 3 days with different doses of DW0254, data  
489 represent mean ± SD of 2 independent experiments with n=3 samples for each condition. Live:  
490 AnnV<sup>-</sup>/PI<sup>-</sup>; Early apoptosis: AnnV<sup>+</sup>/PI<sup>-</sup>; Late apoptosis: AnnV<sup>+</sup>/PI<sup>+</sup>; and Dead: AnnV<sup>-</sup>/PI<sup>+</sup>. **F)**  
491 Compound titration in the RAC1-TIAM1 homogeneous time-resolved fluorescence assay  
492 (HTRF) assay showing competition with increasing concentrations of test compounds (either  
493 NSC23766 or DW0254) on X-axis and fluorescence emission (Y-axis).



# Figure 3

**A** bioRxiv preprint doi: <https://doi.org/10.1101/2022.03.14.484294>; this version posted March 14, 2022. The copyright holder for this preprint (which was not certified by peer review) is the author/funder. All rights reserved. No reuse allowed without permission.

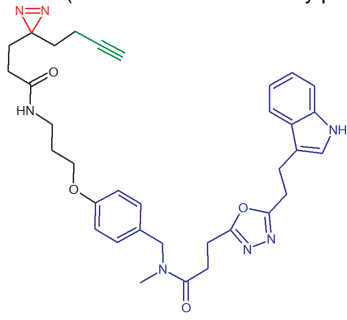

**B** P12-UCHIKAWA

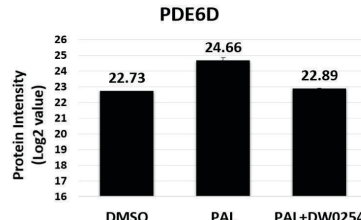

| Protein Description |           |                 | PAL-MS   |     |              |     |
|---------------------|-----------|-----------------|----------|-----|--------------|-----|
| Protein ID          | Gene name | Unique peptides | PAL/DMSO |     | PAL/PAL + DW |     |
|                     |           |                 | q value  | FC  | q value      | FC  |
| O43924              | PDE6D     | 3               | 2.20E-03 | 3.8 | 1.96E-02     | 3.4 |

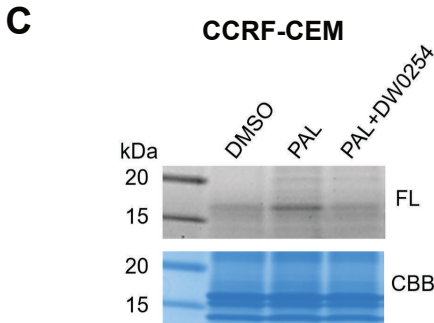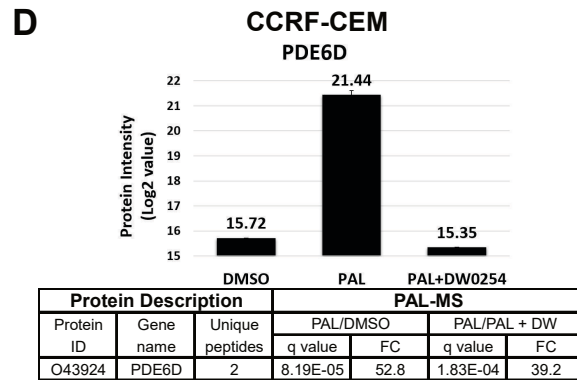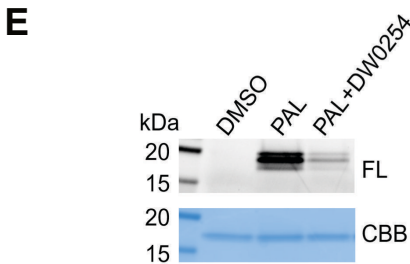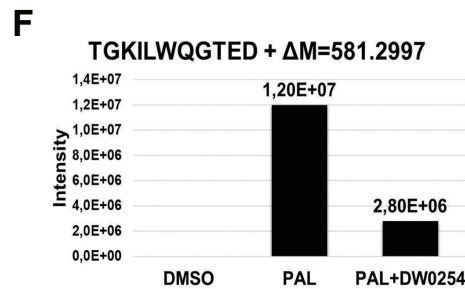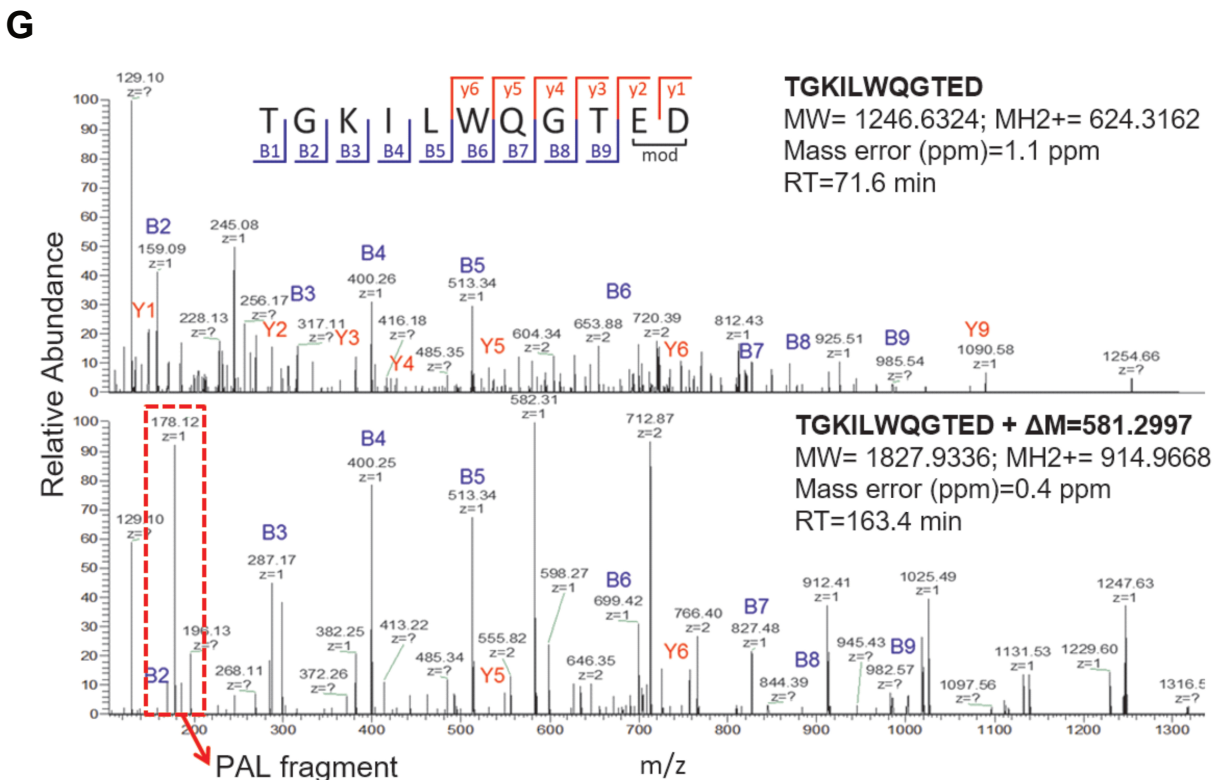

494 **Figure 3. Identification of the DW0254 molecular target PDE6D by Photoaffinity Labeling**  
495 **Mass Spectrometry (PALMS). A)** Chemical structure of DW0254-photoprobe PAL. The  
496 DW0254 warhead is colored in blue, the photoreactive diazirine group in red, and the alkyne  
497 clickable group in green. **B) top:** MS signal intensity of protein target hit of DW0254 in the  
498 pulldown samples of P12-ICHIKAWA cells. Histogram plots represent quantitative determination  
499 of PDE6D MS signal intensity in the different pulldown samples (DMSO, PAL alone, and PAL in  
500 combination with a 20-fold molar excess of DW0254). Conditions analyzed included P12-  
501 ICHIKAWA cells that were treated with PAL (1 $\mu$ M)  $\pm$  DW0254 (20 $\mu$ M) prior UV irradiation,  
502 streptavidin pulldown and label-free differential quantitative mass spectrometry analysis. Three  
503 biological replicates for each sample were performed. **bottom:** Summary of the significant  
504 protein target hits of PAL identified in P12-ICHIKAWA; Proteins with an adjusted p-value (or q  
505 value) <5% and a FC of >2 were selected to be differentially modulated. A protein was  
506 considered as a hit of DW0254 when identified with at least two peptides in minimum 2 out of 3  
507 replicates, FC>2 and adjusted p-values <0.05 in the two comparisons, PAL/DMSO and  
508 PAL/PAL+DW0254. **C)** In-gel fluorescence scanning showing the proteome reactivity profiles of  
509 live CCRF-CEM cells photolabeled by PAL (1 $\mu$ M) with or without DW0254 (20 $\mu$ M). FL = in-gel  
510 fluorescence scanning. CBB = Coomassie gel. **D) top:** MS signal intensity of PDE6D in CCRF-  
511 CEM pulldown samples. Histogram plots represent quantitative determination of PDE6D MS  
512 signal intensity in the different pulldown samples (DMSO, PAL alone, and PAL in combination  
513 with a 20-fold molar excess of DW0254). Y-axis shows log<sub>2</sub> value of protein identified. Proteins  
514 eluted from the beads were separated by SDS-PAGE and protein bands within the molecular  
515 weight range 15-18kDa were excised. Proteins were prepared for downstream label-free  
516 differential quantitative mass spectrometry analysis. Three biological replicates for each sample  
517 were performed. **bottom:** Summary of the significant protein target hits of PAL identified in  
518 CCRF-CEM cells; Proteins with an adjusted p-value (or q value) <5% and a FC of >2 were  
519 selected to be differentially modulated. A protein was considered as a hit of DW0254 when

520 identified with at least two peptides in minimum 2 out of 3 replicates, FC>2 and adjusted p-  
521 values <0.05 in the two comparisons, PAL/DMSO and PAL/PAL+DW0254. **E)** In-gel  
522 fluorescence scanning showing the recombinant human His-TEV-PDE6D-Avitag protein  
523 photolabeled by PAL (1 $\mu$ M) with or without DW0254 (20 $\mu$ M). **F)** Single-stage LC-MS (MS1)  
524 intensity values of PAL-modified peptide TGKILWQGTED following His-TEV-PDE6D-Avitag  
525 protein labeling with PAL in competition with DW0254. The peptide adduct was identified in the  
526 sample irradiated with PAL in the presence of DW0254 but with a peak intensity >4-fold lower  
527 compared to the sample irradiated with PAL alone. **G)** The second stage of mass spectrometry  
528 (MS2) for the PAL-modified peptide TGKILWQGTED of His-TEV-PDE6D-Avitag protein. MS2  
529 spectra of the probe-modified peptide 1827.9216 m/z and its intact counterpart 1246.6193 m/z.  
530 Unlabeled fragment ions y1-y6 and b1-b9 were detected in both the PAL-modified peptide  
531 TGKILWQGTED and its intact counterpart. The fragment ion +178.12m/z cleaved from PAL1  
532 upon CID fragmentation was detected only in the MS2 spectrum of the PAL1-modified peptide.  
533 FL: in-gel fluorescence scanning. CBB: Coomassie gel.

# Figure 4

**A** bioRxiv preprint doi: <https://doi.org/10.1101/2022.03.14.484294>; this version posted March 14, 2022. The copyright holder for this preprint (which was not certified by peer review) is the author/funder. All rights reserved. No reuse allowed without permission.

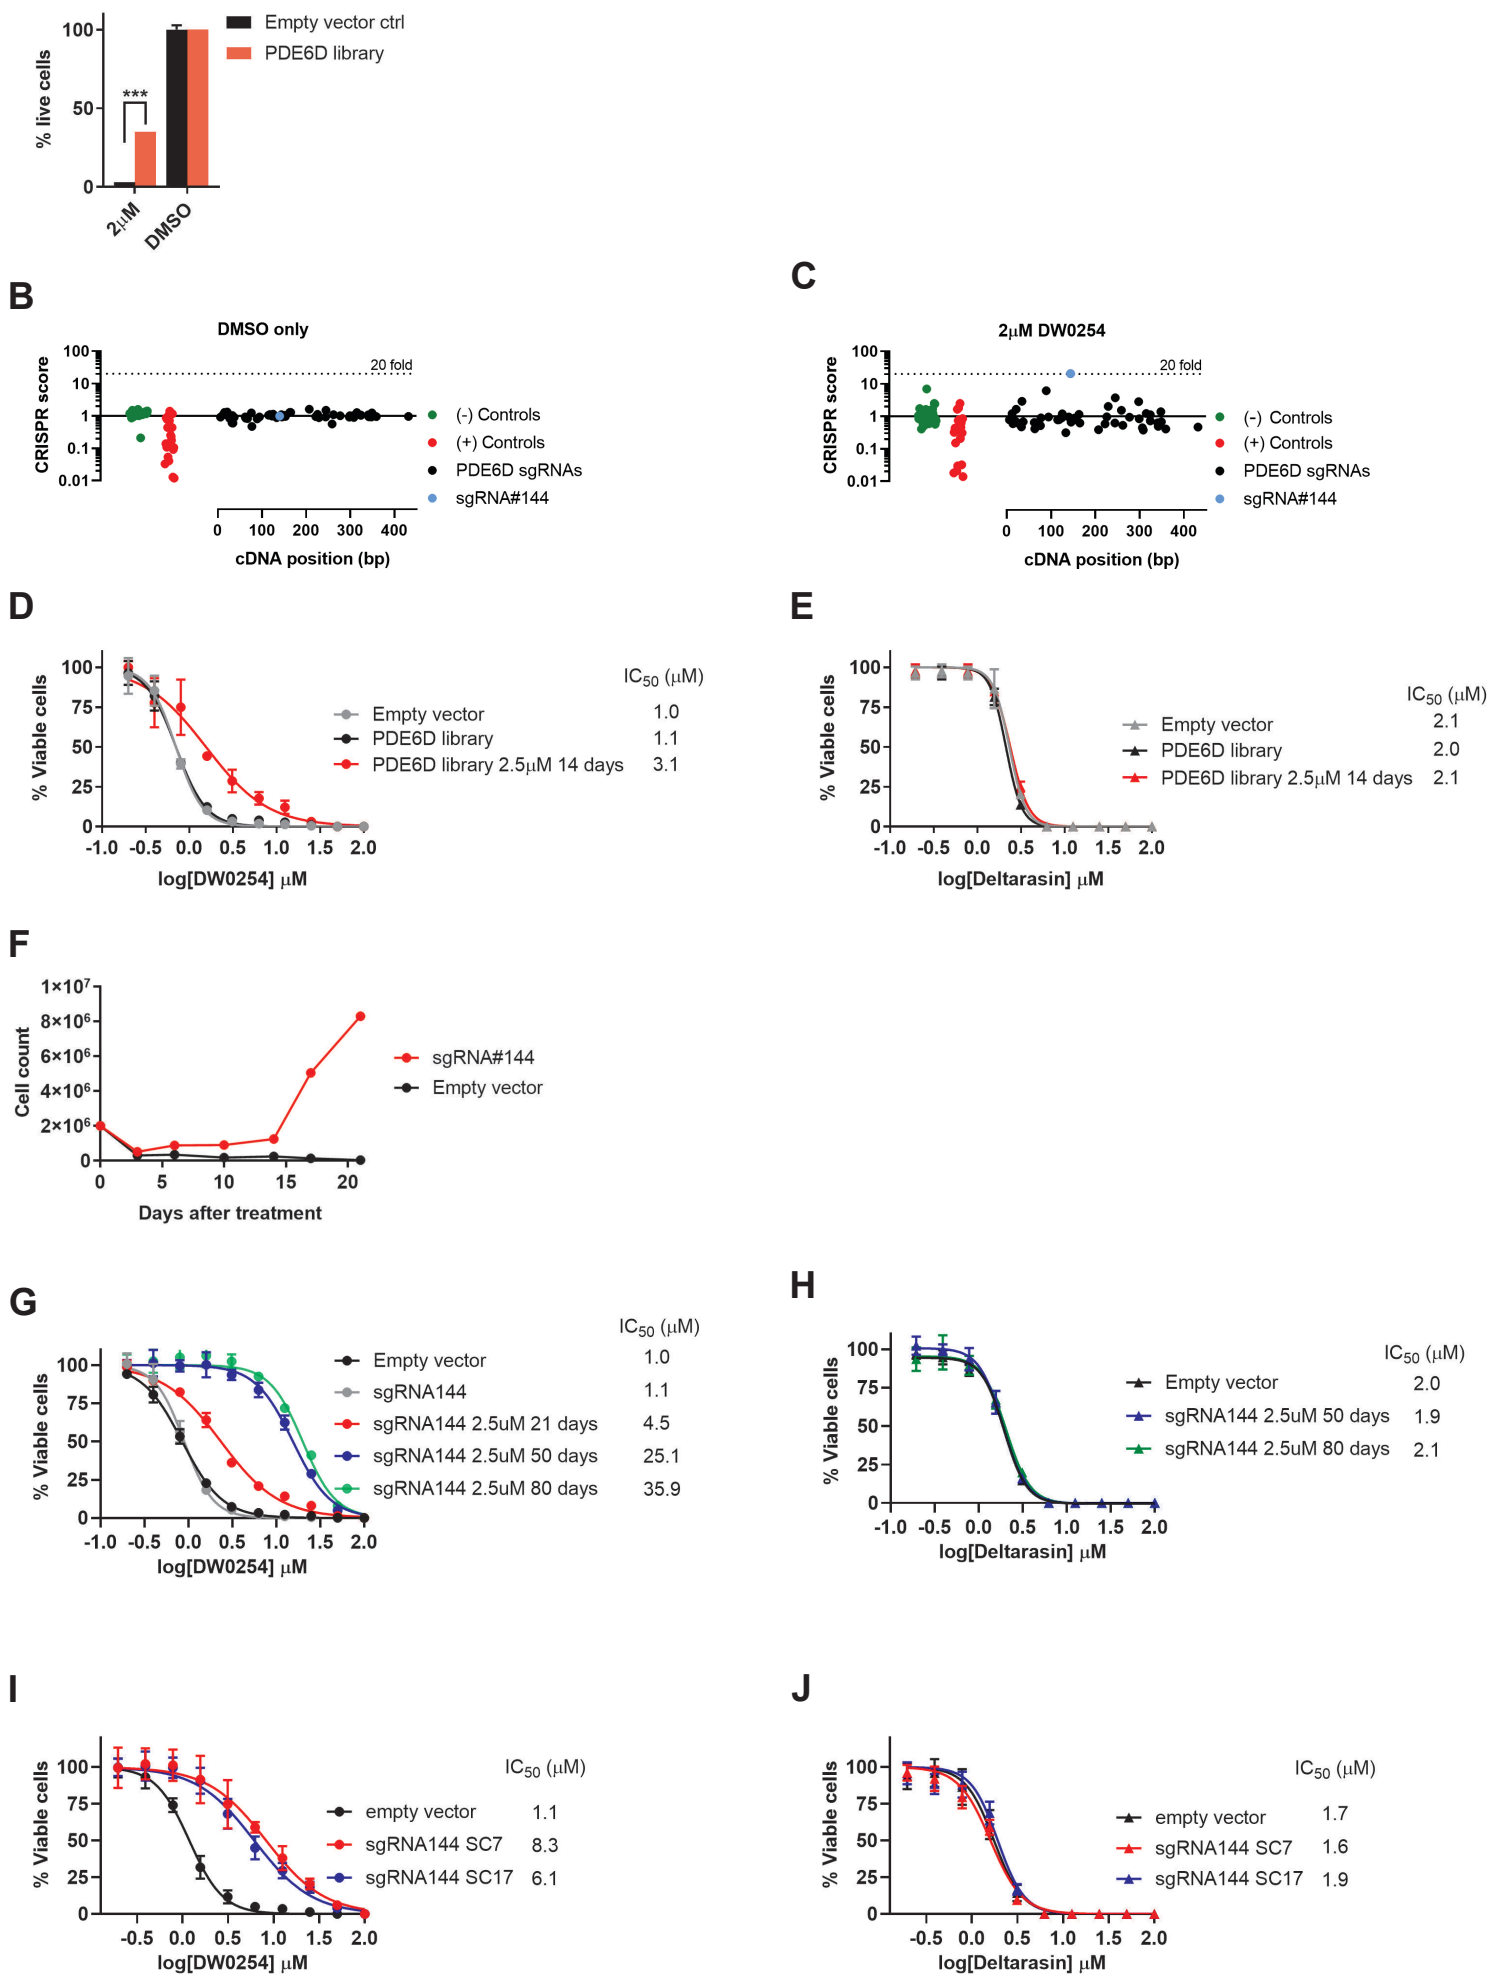

534 **Figure 4. Identification of mutations on V49 and neighboring residues of PDE6D**  
535 **hydrophobic domain as essential for cellular resistance to DW0254. A)** Percentage of live  
536 P12-ICHIKAWA cells by DAPI staining after transduction with either PDE6D library or empty  
537 vector control treated for two weeks with 2 $\mu$ M of DW0254 or DMSO, data represent mean  $\pm$ SD  
538 of 3 technical replicates, \*\*\*P $\leq$ 0.001. **B)** Changes in barcoded sgRNAs of untreated PDE6D  
539 library cells 14 days after transduction. The cDNA position (in bp) is shown on the X-axis. The  
540 fold-change in CRISPR score is shown on the Y-axis. Negative and positive controls are shown  
541 in green and red dots, respectively. Negative controls used were non targeting sgRNAs and  
542 positive controls targeting essential genes, including PCNA, CDK1, CDK9, RPA3, BRD4, MYC  
543 and RPS20. **C)** Changes in barcoded sgRNAs of PDE6D library cells treated for 14 days with  
544 2 $\mu$ M of DW0254 versus 14 days of DMSO. Dotted line on panels B and C represents a 20-fold  
545 change on CRISPR score. **D)** DW0254 dose response curves showing % of viable PDE6D  
546 library cells or controls untreated or treated with DW0254 at 2.5 $\mu$ M for 14 days. **E)** Deltarasin  
547 dose response curves showing % of viable empty vector transduced cells, untreated PDE6D  
548 library cells and PDE6D library cells treated with DW0254 for 14 days. **F)** Cell growth curves for  
549 P12-ICHIKAWA cells expressing Cas9 only or Cas9 and sgRNA144, treated with 2.5 $\mu$ M of  
550 DW0254 for 21 days. **G)** DW0254 dose response curves showing % of viable empty vector  
551 transduced cells, untreated sgRNA144 transduced cells, and sgRNA144 cells treated with  
552 DW0254 for 21, 50 and 80 days. **H)** Deltarasin dose response curves showing % of viable  
553 untreated sgRNA144 transduced cells and controls, and sgRNA144 cells treated with DW0254  
554 for 21, 50 and 80 days; For panels D, E, G and H: data represent mean  $\pm$  SD of 2 independent  
555 experiments with N=3 samples for each condition. **I)** DW0254 dose response curves showing %  
556 of viable cells transduced with empty vector and two single cell clones of sgRNA144 transduced  
557 cells. **J)** Deltarasin dose response curves showing % of viable empty vector and two single cell  
558 clones of sgRNA144 transduced cells; For panels I and J data represent mean  $\pm$ SD of 2  
559 independent experiments with N=4 samples for each condition.

# Figure 5

**A** bioRxiv preprint doi: <https://doi.org/10.1101/2022.03.14.484294>; this version posted March 14, 2022. The copyright holder for this preprint (which was not certified by peer review) is the author/funder. All rights reserved. No reuse allowed without permission.

| Compounds  | Stoichiometry | K <sub>d</sub> (nM) | ΔG (kcal.M <sup>-1</sup> ) | ΔH (kcal.M <sup>-1</sup> ) | -TΔS (kcal.M <sup>-1</sup> ) |
|------------|---------------|---------------------|----------------------------|----------------------------|------------------------------|
| (1) DW0069 | 1             | 1855 (±75)          | -7.82 (±0.02)              | -6.05 (±0.21)              | -1.78 (±0.23)                |
| (2) DW0254 | 1             | 436 (±6)            | -8.68 (±0.01)              | -9.18 (±0.2)               | 0.5 (±0.22)                  |
| (3) DW0441 | 1             | 460 (±36)           | -8.65 (±0.05)              | -8.40 (±0.21)              | -0.25 (±0.17)                |
| Deltarasin | 1             | 194 (±41)           | -9.17 (±0.12)              | -7.14 (±0.04)              | -2.03 (±0.16)                |

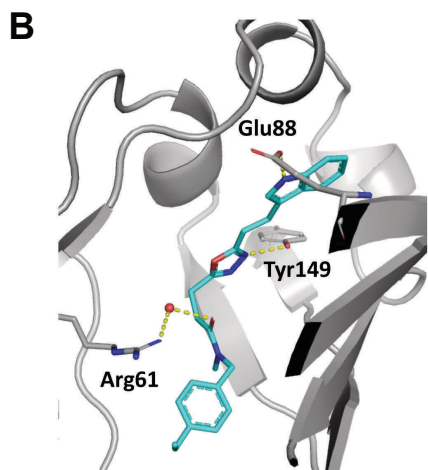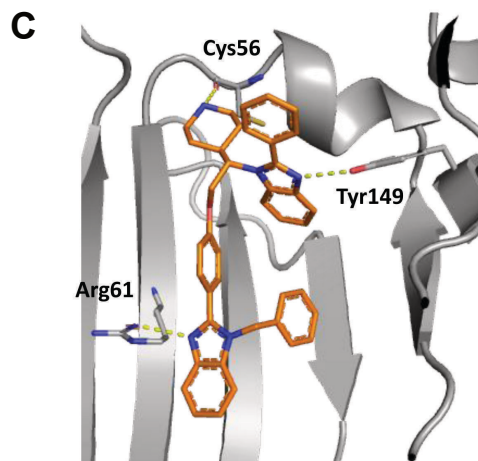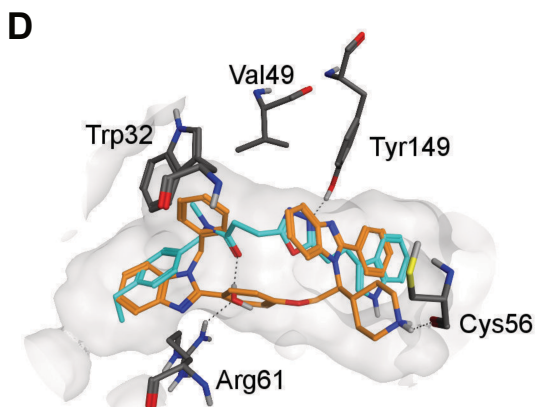

**E**

| Structure                    | Ligand     | RMSD (Å) |
|------------------------------|------------|----------|
| WT apo X-ray                 | DW-0254    | 0.8      |
|                              | Deltarasin | 1.1      |
| R48del V49del homology model | DW-0254    | 11.1     |
|                              | Deltarasin | 1.4      |

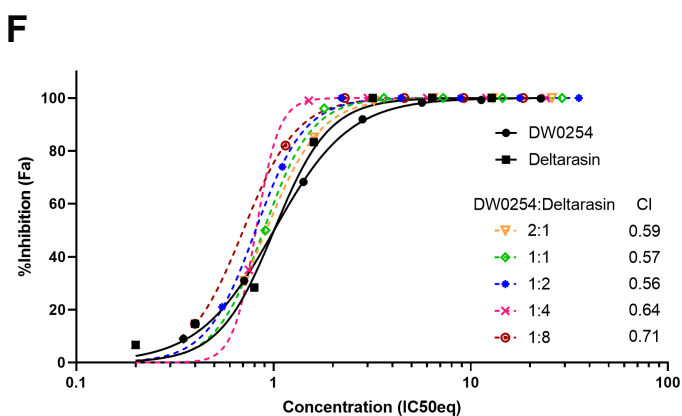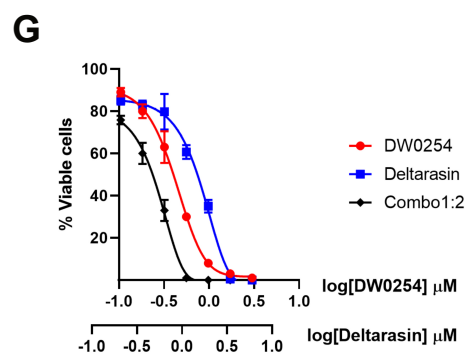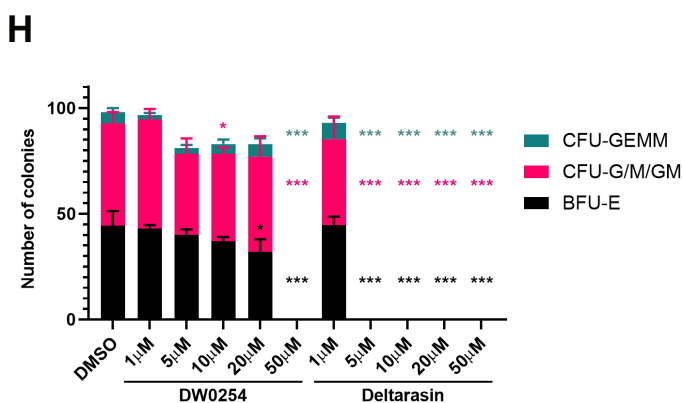

560 **Figure 5. Co-Crystallization of PDE6D and DW0254 confirms compound binding to**  
561 **hydrophobic pocket and evidences different binding modes between this inhibitor and**  
562 **Deltarasin. A)** Binding affinity (Kd) and thermodynamics parameters for ligand binding to  
563 PDE6D determined by Isothermal Titration Calorimetry (ITC). **B)** The crystal structure of  
564 compound DW0254 in the PDE6D-binding pocket; Q88, R61 and Y149 are shown in sticks to  
565 highlight the hydrogen bond interactions. **C)** The crystal structure of Deltarasin in the PDE6D-  
566 binding pocket; C56, R61 and Y149 are shown in sticks to highlight the hydrogen bond  
567 interactions. **D)** Experimental binding mode of DW-0254 (cyan) in wild type PDE6D. The  
568 superposed 3D coordinates of Deltarasin (orange) are also shown. Several binding site  
569 residues, including V49, are shown for reference. **E)** Docking results in wild type apo structure  
570 of PDE6D and R48delV49del mutant; Root mean square deviation (RMSD) with respect to 3D  
571 coordinates of the ligands in the superposed X-ray complex of the wild type protein are  
572 reported. **F)** Drug dosage curves for P12-ICHIKAWA cells treated with DW0254 alone,  
573 Deltarasin alone, or various combinations of both obtained from a full matrix using the “Fixed  
574 Ratio” Method; data shows mean  $\pm$  SD of n=3 samples for each condition, and combination  
575 indexes for each combo calculated using the Chou-Talalay theorem. **G)** Drug dosage curves for  
576 P12-ICHIKAWA cells treated with DW0254 alone, Deltarasin alone, or the combination of both  
577 at a 1:2 ratio; data shows mean  $\pm$  SD of n=3 samples for each condition. **H)** Colony counts of  
578 healthy human CD34<sup>+</sup> cells after 14 days culture in MethoCult H4435 enriched medium in  
579 presence of DMSO or increasing concentrations of DW0254 or Deltarasin. CFU-GEMM:  
580 Colony-forming unit – granulocyte, erythroid, macrophage, megakaryocyte; CFU-GM: Colony-  
581 forming unit – granulocyte, macrophage; BFUE: Burst-forming unit – erythroid. Data represent  
582 mean  $\pm$  SD, n=3 samples for each condition. \*p<0.05; \*\*\*p<0.001

# Figure 6

**A**

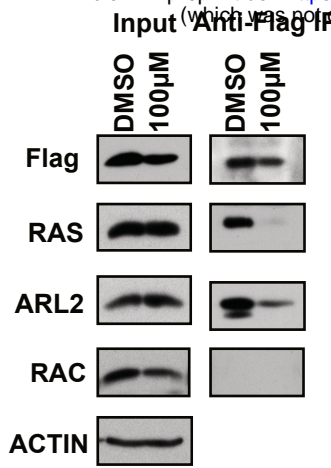

**B**

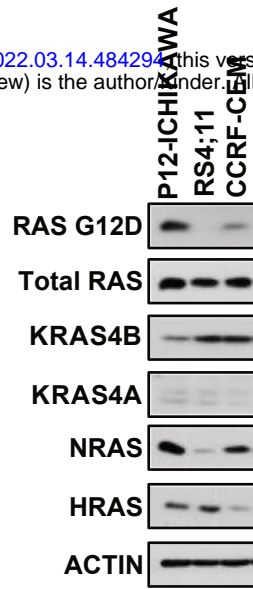

**C**

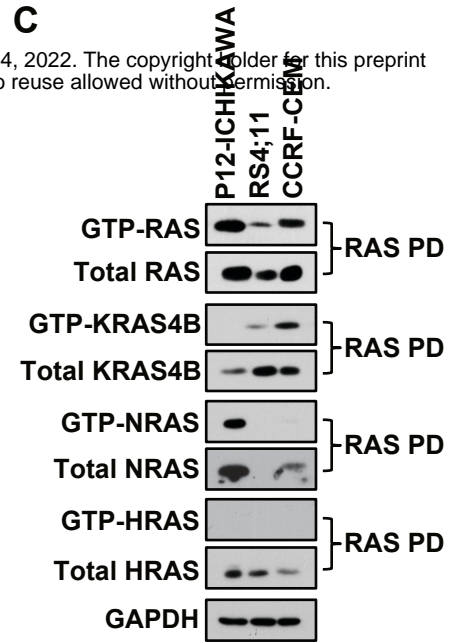

**D**

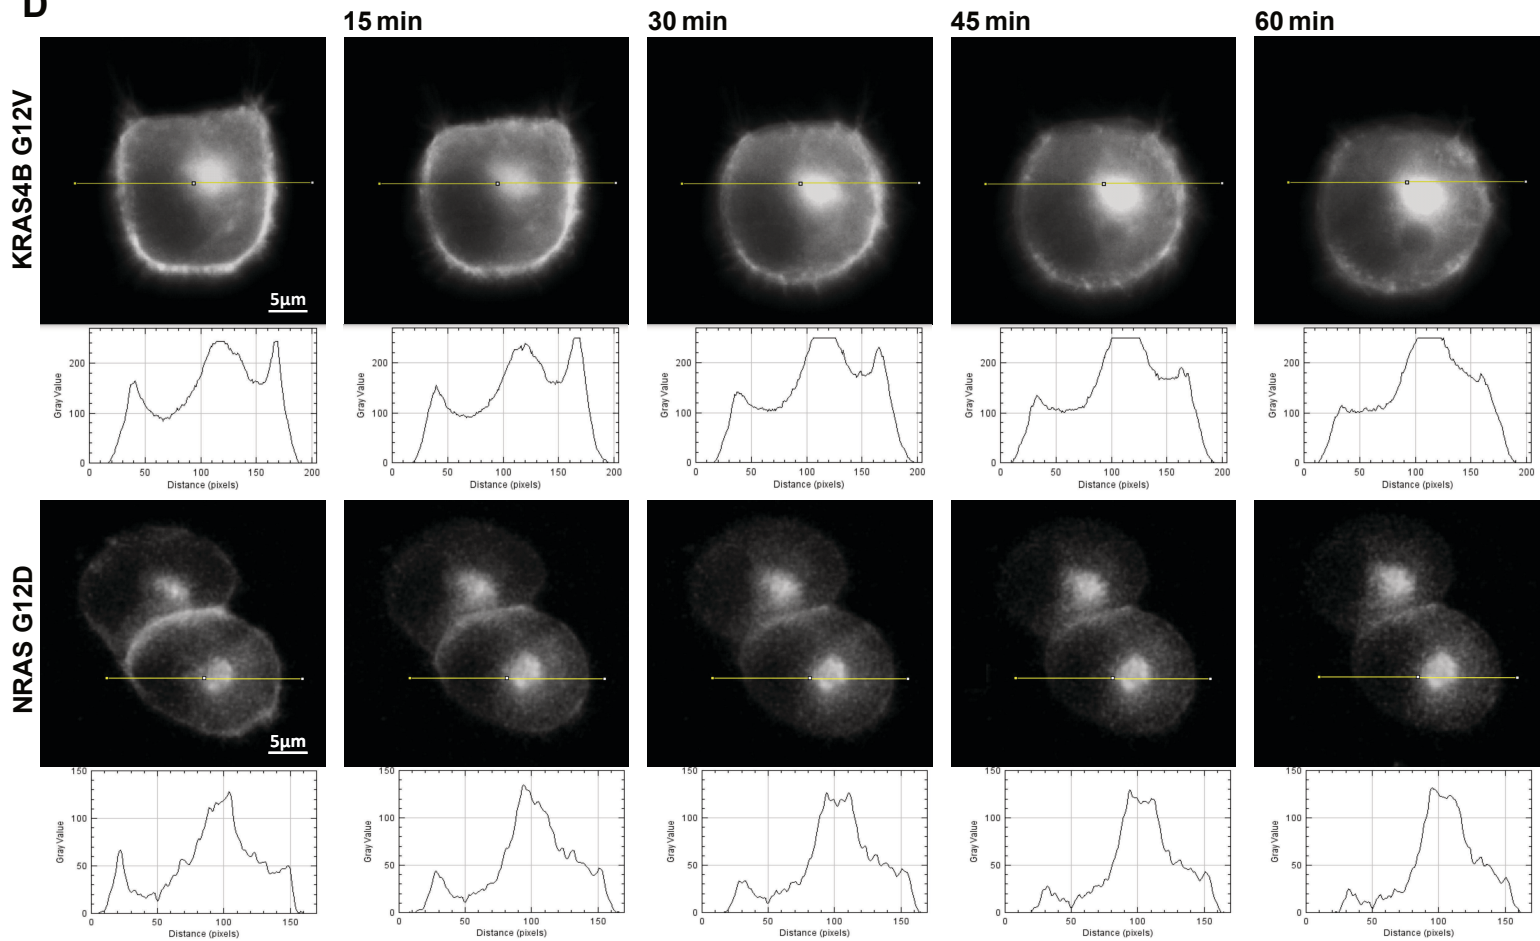

**E**

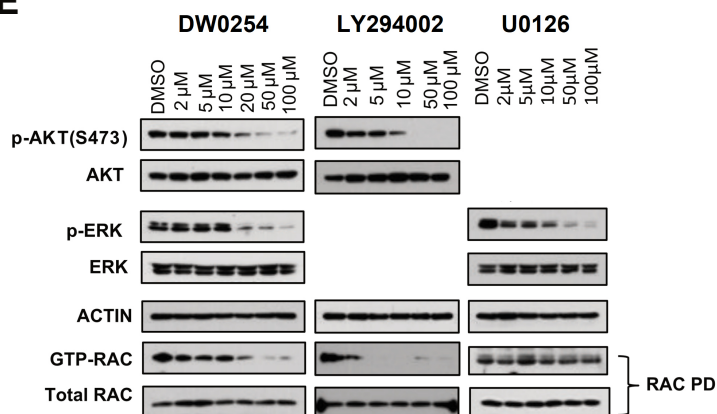



583 **Figure 6. The expression and activation of RAS isoforms in DW0254 sensitive leukemia**  
584 **cells and the effects of DW0254 on PDE6D/RAS interaction and RAS subcellular location.**  
585 **A)** DW0254 treatment inhibits the binding of PDE6D to RAS and ARL2 in P12-ICHIKAWA cells.  
586 Co-immunoprecipitation (CoIP) was performed with an anti-FLAG antibody (F1804, Sigma-  
587 Aldrich) on lysates from FLAG-tagged PDE6D transduced P12-ICHIKAWA cells treated with  
588 100µM DW0254 or DMSO. Cell lysates (Input) and protein eluted from beads (IP) were  
589 analyzed by Western blotting with anti-Flag, anti-RAS (05-1072, Millipore Sigma, Billerica, MA),  
590 anti-ARL2 (ab183510, Abcam, Cambridge, MA), anti-RAC (610651, BD) antibodies. **B)** The  
591 expression pattern of RAS isoforms in leukemia cell lines sensitive to DW0254. Western blot  
592 analysis of whole-cell lysates from P12-ICHIKAWA, RS4;11, and CCRF-CEM leukemia cells  
593 detected by anti-RASG12D (14429S, Cell signaling), anti-RAS (05-1072, Millipore Sigma), Anti-  
594 KRAS4B (WH0003845M1, Millipore Sigma), anti-KRAS4A (ABC1442, Millipore Sigma), anti-  
595 NRAS (sc-31, Santa Cruz), and anti-HRAS (18295-1-AP, Proteintech, Rosemont, IL) antibodies.  
596 **C)** Activated RAS isoforms in P12-ICHIKAWA, CCRF-CEM and RS4;11 cells. GST pulldown  
597 assays were performed by incubating protein lysates prepared from P12-ICHIKAWA, CCRF-  
598 CEM and RS4;11 with RAF-1 RBD conjugated agarose beads. The GTP-RAS proteins bound to  
599 the beads or the whole cell lysates to detect the level of total RAS protein were identified using  
600 anti-RAS, anti-KRAS4B, anti-NRAS, or anti-HRAS antibodies described above. For Figure 6A,  
601 6B, and 6C, beta-ACTIN or GAPDH (A300-641A, BETHYL, Montgomery, TX) were used as a  
602 protein loading control, one representative experiment of two or three is shown. **D)**  
603 Mislocalization from cell surface membrane of GFP-tagged mutant KRAS4BG12V (upper panel)  
604 or NRASG12D (lower panel) in PANC-1 cells after treatment with 20µM of DW0254. Time in  
605 minutes is indicated above the panels; the first panel represents the moment immediately after  
606 the addition of the inhibitor. The intensity profiles show changes in the signal on the Y-axis  
607 along the yellow lines on the micrographs above. **E)** Western blot showing total and  
608 phosphorylated AKT and ERK, and pulldown results for RAC activation in P12-ICHIKAWA cells

609 treated with increasing doses of DW0254, PI3K inhibitor LY294002, or MEK inhibitor U0126 for  
610 3 hours. Total AKT, and ERK expression were assessed using anti-AKT (9272, Cell signaling)  
611 and anti-ERK (9102S, Cell signaling) antibody respectively. Phosphorylation of AKT and ERK  
612 were assessed using anti-phospho-AKT Ser473 (9271S, Cell signaling) and anti-phospho-ERK  
613 (4377S, Cell signaling) antibody respectively. Total RAC and GTP-RAC were analyzed by RAC  
614 pull-down assay as described in Figure 2E. For Figure 6A, 6B, 6C, and 6D, beta-ACTIN or GAPDH  
615 were used as a protein loading control. Data represent three independent experiments.

# Figure 7

bioRxiv preprint doi: <https://doi.org/10.1101/2022.03.14.484294>; this version posted March 14, 2022. The copyright holder for this preprint (which was not certified by peer review) is the author/funder. All rights reserved. No reuse allowed without permission.

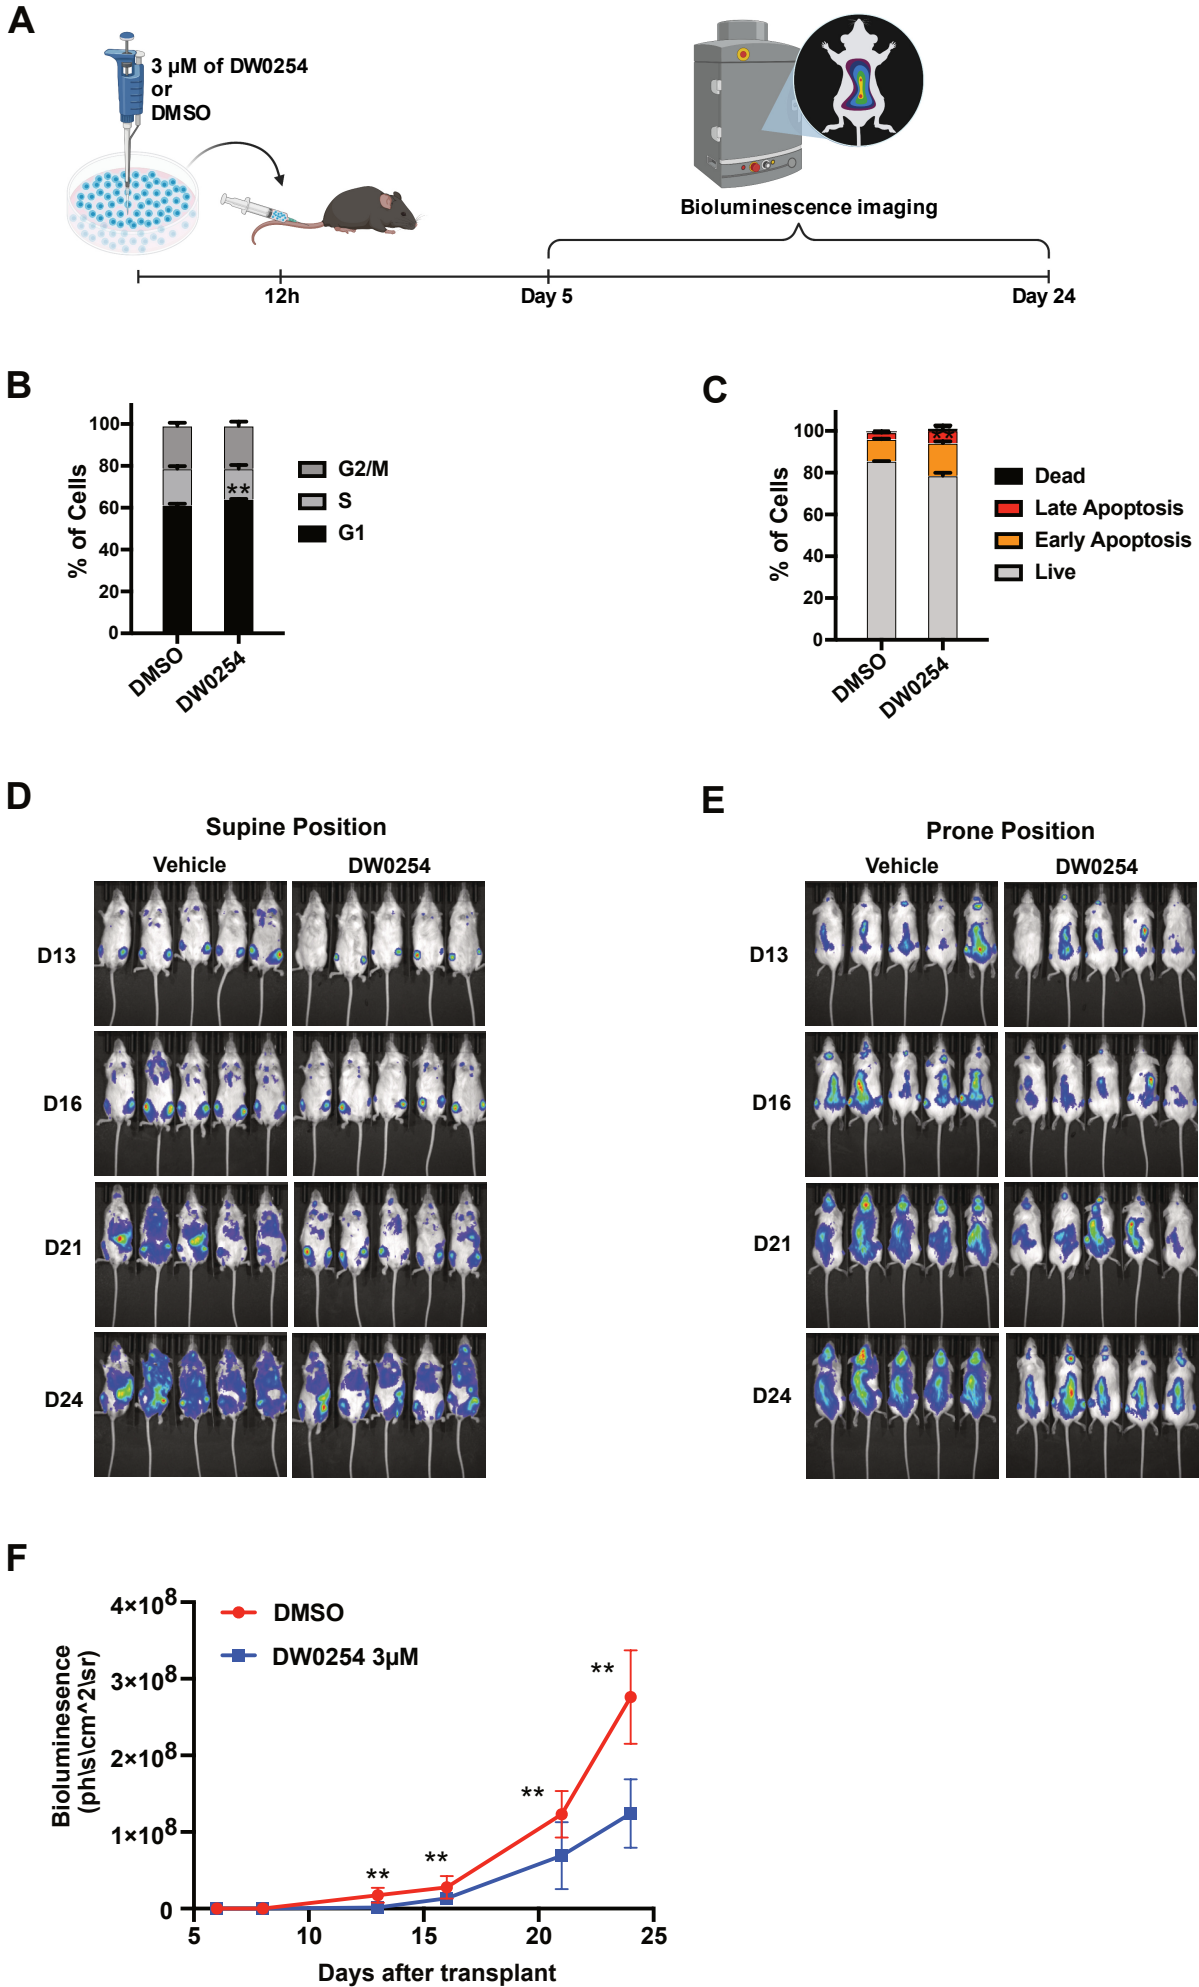

616 **Figure 7. DW0254 ex vivo treatment reduces leukemic tumor burden of P12-ICHIKAWA**  
617 **mouse xenograft model. A)** Schedule of *ex vivo* treatment. Luciferase expressing P12-  
618 ICHIKAWA cells treated for 12 hours with either 3 $\mu$ M of DW0254 or DMSO before  
619 transplantation into NSG mice; Bioluminescence imaging was performed every 3-5 days to  
620 assess tumor burden between day 5 and day 24 after transplantation. Created with  
621 BioRender.com. **B)** Bar graph showing the cell cycle distribution by DAPI staining of P12-  
622 ICHIKAWA cells treated for 12 hours with 3 $\mu$ M of DW0254, data represent mean  $\pm$  SD of 2  
623 independent experiments with n=3 samples for each condition, \*\* p<0.01. **C)** Bar graph showing  
624 percentage of apoptosis by AnnV/DAPI staining of P12-ICHIKAWA cells treated for 12 hours  
625 with 3 $\mu$ M of DW0254, data represent mean  $\pm$  SD of 2 independent experiments with n=3  
626 samples for each condition, \*\* p<0.01. Live: AnnV<sup>-</sup>/DAPI<sup>-</sup>; Early apoptosis: AnnV<sup>+</sup>/DAPI<sup>-</sup>; Late  
627 apoptosis: AnnV<sup>+</sup>/DAPI<sup>+</sup>; and Dead: AnnV<sup>-</sup>/DAPI<sup>+</sup>. **D)** Representative images in the prone or **E)**  
628 supine position of bioluminescence imaging (BLI) from NSG mice transplanted with P12-  
629 ICHIKAWA leukemia cells expressing luciferase after treatment with 3 $\mu$ M DW0254 *ex vivo* for  
630 12 hours. **F)** Quantification of BLI in NSG mice transplanted with luciferase-expressing P12-  
631 ICHIKAWA cells after *ex vivo* treatment with 3 $\mu$ M DW0254 for 12 hours. The days after  
632 transplantation are shown in X-axis, and the bioluminescence intensity is shown in Y-axis. Data  
633 represent mean  $\pm$ SD, \*\*p<0.01, n=10 mice per group, and were representative of 2 independent  
634 experiments.

635 **References:**

- 636 1. Troeger, A. and D.A. Williams, *Hematopoietic-specific Rho GTPases Rac2 and RhoH and*  
637 *human blood disorders*. Exp Cell Res, 2013. **319**(15): p. 2375-83.
- 638 2. Cancelas, J.A., et al., *Rac GTPases differentially integrate signals regulating*  
639 *hematopoietic stem cell localization*. Nat Med, 2005. **11**(8): p. 886-91.
- 640 3. Bos, J.L., *ras oncogenes in human cancer: a review*. Cancer Res, 1989. **49**(17): p. 4682-  
641 9.
- 642 4. Prior, I.A., P.D. Lewis, and C. Mattos, *A comprehensive survey of Ras mutations in cancer*.  
643 Cancer Res, 2012. **72**(10): p. 2457-67.
- 644 5. Tyner, J.W., et al., *High-throughput sequencing screen reveals novel, transforming RAS*  
645 *mutations in myeloid leukemia patients*. Blood, 2009. **113**(8): p. 1749-55.
- 646 6. Neri, A., et al., *Analysis of ras oncogene mutations in human lymphoid malignancies*. Proc  
647 Natl Acad Sci USA, 1988. **85**: p. 9268-9272.
- 648 7. Loh, M.L., *Recent advances in the pathogenesis and treatment of juvenile*  
649 *myelomonocytic leukaemia*. Br J Haematol, 2011. **152**(6): p. 677-87.
- 650 8. Zhang, J., et al., *The genetic basis of early T-cell precursor acute lymphoblastic leukaemia*.  
651 Nature, 2012. **481**(7380): p. 157-63.
- 652 9. Perentesis, J.P., et al., *RAS oncogene mutations and outcome of therapy for childhood*  
653 *acute lymphoblastic leukemia*. Leukemia, 2004. **18**(4): p. 685-92.
- 654 10. Irving, J., et al., *Ras pathway mutations are prevalent in relapsed childhood acute*  
655 *lymphoblastic leukemia and confer sensitivity to MEK inhibition*. Blood, 2014. **124**(23): p.  
656 3420-30.
- 657 11. Oshima, K., et al., *Mutational landscape, clonal evolution patterns, and role of RAS*  
658 *mutations in relapsed acute lymphoblastic leukemia*. Proc Natl Acad Sci U S A, 2016.  
659 **113**(40): p. 11306-11311.

- 660 12. Canon, J., et al., *The clinical KRAS(G12C) inhibitor AMG 510 drives anti-tumour immunity.*  
661 Nature, 2019. **575**(7781): p. 217-223.
- 662 13. Hallin, J., et al., *The KRAS(G12C) Inhibitor MRTX849 Provides Insight toward Therapeutic*  
663 *Susceptibility of KRAS-Mutant Cancers in Mouse Models and Patients.* Cancer Discov,  
664 2020. **10**(1): p. 54-71.
- 665 14. Qiu, R.G., et al., *An essential role for Rac in Ras transformation.* Nature, 1995. **374**(6521):  
666 p. 457-9.
- 667 15. Thomas, E.K., et al., *Rac guanosine triphosphatases represent integrating molecular*  
668 *therapeutic targets for BCR-ABL-induced myeloproliferative disease.* Cancer Cell, 2007.  
669 **12**(5): p. 467-78.
- 670 16. Mizukawa, B., et al., *Inhibition of Rac GTPase signaling and downstream pro-survival Bcl-*  
671 *2 proteins as combination targeted therapy in MLL-AF9 leukemia.* Blood, 2011.
- 672 17. Cox, A.D., et al., *Drugging the undruggable RAS: Mission possible?* Nat Rev Drug Discov,  
673 2014. **13**(11): p. 828-51.
- 674 18. Williams, D.A., *Compounds for treating Rac-GTPase mediated disorder.* Patent Int. WO,  
675 2014. **059305**.
- 676 19. Gao, Y., et al., *Rational design and characterization of a Rac GTPase-specific small*  
677 *molecule inhibitor.* Proc Natl Acad Sci U S A, 2004. **101**(20): p. 7618-23.
- 678 20. Wei, J., et al., *Microenvironment determines lineage fate in a human model of MLL-AF9*  
679 *leukemia.* Cancer Cell, 2008. **13**(6): p. 483-95.
- 680 21. Levay, M., et al., *NSC23766, a widely used inhibitor of Rac1 activation, additionally acts*  
681 *as a competitive antagonist at muscarinic acetylcholine receptors.* J Pharmacol Exp Ther,  
682 2013. **347**(1): p. 69-79.
- 683 22. Li, Z., et al., *Design and synthesis of minimalist terminal alkyne-containing diazirine photo-*  
684 *crosslinkers and their incorporation into kinase inhibitors for cell- and tissue-based*  
685 *proteome profiling.* Angew Chem Int Ed Engl, 2013. **52**(33): p. 8551-6.

- 686 23. Zimmermann, G., et al., *Small molecule inhibition of the KRAS-PDEdelta interaction*  
687 *impairs oncogenic KRAS signalling*. Nature, 2013. **497**(7451): p. 638-42.
- 688 24. Chandra, A., et al., *The GDI-like solubilizing factor PDEδ sustains the spatial organization*  
689 *and signalling of Ras family proteins*. Nat Cell Biol, 2011. **14**(2): p. 148-58.
- 690 25. Tsai, F.D., et al., *K-Ras4A splice variant is widely expressed in cancer and uses a hybrid*  
691 *membrane-targeting motif*. Proc Natl Acad Sci U S A, 2015. **112**(3): p. 779-84.
- 692 26. Chandra, A., et al., *The GDI-like solubilizing factor PDEdelta sustains the spatial*  
693 *organization and signalling of Ras family proteins*. Nat Cell Biol, 2011. **14**(2): p. 148-58.
- 694 27. Rajalingam, K., et al., *Ras oncogenes and their downstream targets*. Biochim Biophys  
695 Acta, 2007. **1773**(8): p. 1177-95.
- 696 28. Dharmiah, S., et al., *Structural basis of recognition of farnesylated and methylated*  
697 *KRAS4b by PDEdelta*. Proc Natl Acad Sci U S A, 2016. **113**(44): p. E6766-E6775.
- 698 29. Tan, L., et al., *An oxanthroquinone derivative that disrupts RAS plasma membrane*  
699 *localization inhibits cancer cell growth*. J Biol Chem, 2018. **293**(35): p. 13696-13706.
- 700 30. Gorlick, R., et al., *Testing of the Akt/PKB inhibitor MK-2206 by the Pediatric Preclinical*  
701 *Testing Program*. Pediatr Blood Cancer, 2012. **59**(3): p. 518-24.
- 702 31. Doench, J.G., et al., *Optimized sgRNA design to maximize activity and minimize off-target*  
703 *effects of CRISPR-Cas9*. Nat Biotechnol, 2016. **34**(2): p. 184-191.
- 704 32. Langmead, B., et al., *Ultrafast and memory-efficient alignment of short DNA sequences*  
705 *to the human genome*. Genome Biol, 2009. **10**(3): p. R25.
- 706 33. Chou, T.C. and P. Talalay, *Quantitative analysis of dose-effect relationships: the*  
707 *combined effects of multiple drugs or enzyme inhibitors*. Adv Enzyme Regul, 1984. **22**: p.  
708 27-55.
- 709 34. Zhao, J., K. Kelnar, and A.G. Bader, *In-depth analysis shows synergy between erlotinib*  
710 *and miR-34a*. PLoS One, 2014. **9**(2): p. e89105.
